# Supplementary material for: Factors associated with polypharmacy in primary care: a cross-sectional analysis of data from The English Longitudinal Study of Ageing (ELSA)
Source: PubMed Central journal article supplement — BMJ Open. 2018 Mar 14;8(3):e020270. doi: 10.1136/bmjopen-2017-020270 (PMC5857661; doi:10.1136/bmjopen-2017-020270), 2018-03-14
Supplement: bmjopen-2017-020270.draft_revisions.pdf [file bmjopen-2017-020270.draft_revisions.pdf]

# BMJ Open

BMJ Open is committed to open peer review. As part of this commitment we make the peer review history of every article we publish publicly available.

When an article is published we post the peer reviewers' comments and the authors' responses online. We also post the versions of the paper that were used during peer review. These are the versions that the peer review comments apply to.

The versions of the paper that follow are the versions that were submitted during the peer review process. They are not the versions of record or the final published versions. They should not be cited or distributed as the published version of this manuscript.

BMJ Open is an open access journal and the full, final, typeset and author-corrected version of record of the manuscript is available on our site with no access controls, subscription charges or pay-per-view fees (<http://bmjopen.bmj.com>).

If you have any questions on BMJ Open's open peer review process please email [editorial.bmjopen@bmj.com](mailto:editorial.bmjopen@bmj.com)

# BMJ Open

## Factors driving polypharmacy in primary care: A cross-sectional study

|                               |                                                                                                                                                                                                                                                   |
|-------------------------------|---------------------------------------------------------------------------------------------------------------------------------------------------------------------------------------------------------------------------------------------------|
| Journal:                      | <i>BMJ Open</i>                                                                                                                                                                                                                                   |
| Manuscript ID                 | bmjopen-2017-020270                                                                                                                                                                                                                               |
| Article Type:                 | Research                                                                                                                                                                                                                                          |
| Date Submitted by the Author: | 26-Oct-2017                                                                                                                                                                                                                                       |
| Complete List of Authors:     | Slater, Natasha; Keele University School of Pharmacy, Pharmacy White, Simon; Keele University School of Pharmacy, Pharmacy Venables, Rebecca; Keele University, School of Pharmacy Frisher, Martin; Keele University School of Pharmacy, Pharmacy |
| Keywords:                     | polypharmacy, longitudinal, older people                                                                                                                                                                                                          |
|                               |                                                                                                                                                                                                                                                   |

SCHOLARONE™  
Manuscripts

Peer review only

1  
2  
3  
4  
5  
6  
7  
8  
9  
10  
11  
12  
13  
14  
15  
16  
17  
18  
19  
20  
21  
22  
23  
24  
25  
26  
27  
28  
29  
30  
31  
32  
33  
34  
35  
36  
37  
38  
39  
40  
41  
42  
43  
44  
45  
46  
47  
48  
49  
50  
51  
52  
53  
54  
55  
56  
57  
58  
59  
60

Factors driving polypharmacy in primary care: A cross-sectional study

**Authors:**

Natasha Slater, Simon White, Rebecca Venables, Martin Frisher

School of Pharmacy, Keele University, Staffordshire, ST5 5BG, United Kingdom  
Natasha Slater PhD Student School of Pharmacy, Keele University  
Simon White Senior Lecturer School of Pharmacy, Keele University  
Rebecca Venables Lecturer School of Pharmacy, Keele University  
Martin Frisher Reader School of Pharmacy, Keele University

**Correspondence to:** [n.slater@keele.ac.uk](mailto:n.slater@keele.ac.uk)

**ABSTRACT:**

**OBJECTIVES:** While older age and ill-health are known to be driving polypharmacy, this paper aims to identify whether wealth, body mass index (BMI), smoking and alcohol consumption are also contributing to polypharmacy (5-9 prescribed medications) and hyper-polypharmacy prevalence (>10 prescribed medications), among older people living in England.

**DESIGN:** Cross-sectional study

**SETTING:** The English Longitudinal Study of Ageing (Wave 6)

**PARTICIPANTS:** 7730 participants aged over 50 years old, in May 2012

**DATA SYNTHESIS:** Two multivariate models were created. Hazard ratios (HR) with corresponding 95% confidence intervals (CI), for polypharmacy and hyper-polypharmacy, were calculated after adjusting for gender, age, wealth, smoking, alcohol consumption, BMI, self-rated health and the presence of a long-standing condition.

**RESULTS:** Lower wealth (adjusted HR highest wealth quintile versus lowest wealth quintile, 1.28; 95%CI, 1.04-1.69,  $p=0.02$ ) and obesity (adjusted HR 1.81; 95%CI, 1.53-2.15,  $p<0.001$ ) were independently associated with polypharmacy. Increasing age (adjusted HR 50-59 years versus 70-79 years, 3.42; 95% CI, 2.81-4.77,  $p<0.001$ ) and the presence of a long-standing condition (adjusted HR 2.94;95%CI, 2.55-3.99,  $p<0.001$ ) were also associated with polypharmacy. No statistically significant association between smoking and polypharmacy (adjusted HR 1.06; 95% CI, 0.86-1.29,  $p=0.56$ ) was established; whilst, very frequent alcohol consumption (consuming alcohol >5 times per week) was inversely associated with polypharmacy (adjusted HR never versus very frequently, 0.64; 95%CI, 0.52-0.78,  $p<0.001$ ). The adjusted hazard ratios for hyper-polypharmacy were accentuated, compared to polypharmacy.

**CONCLUSION:** This study has identified that lower wealth, obesity, increasing age and the presence of long-standing conditions are independently driving polypharmacy and hyper-polypharmacy prevalence. The effect of these factors, on polypharmacy and especially hyper-polypharmacy prevalence, is likely to become more pronounced with the widening gap in UK wealth inequalities, the current obesity epidemic and the growing population of older people. The alcohol findings contribute to the debate on the relationship between alcohol consumption and health.

**Keywords:** polypharmacy, longitudinal, demography, older people

## STRENGTHS AND LIMITATIONS OF THIS STUDY

- This cross-sectional study uses medication data, from over 7000 older individuals, to identify factors which are driving polypharmacy prevalence in primary care.
- In the analysis, a large number of covariates were used to minimise the impact of confounding factors.
- Participants were asked to self-report information about their prescribed medication usage. To verify their responses, participants were asked to show their medication containers to the interviewer.
- Smoking and alcohol consumption data was also collected by asking participants to self-report. This relies on accurate and truthful information recall to prevent bias.

## INTRODUCTION

Polypharmacy has been discussed extensively in the literature and media; however, there is no universally accepted definition for the practice of prescribing multiple medications to one individual. [1] At present, polypharmacy is commonly defined as “the use of five or more regular medications”, whilst hyper-polypharmacy is defined as “the use of ten or more regular medications”. Although polypharmacy prevalence has increased over the past decade, there are relatively few data about the factors driving polypharmacy and hyper-polypharmacy.[2] The aim of this study is to determine whether wealth, body mass index (BMI), smoking, alcohol consumption, age and the presence of long-standing conditions, are currently driving the increase in polypharmacy and hyper-polypharmacy prevalence in primary care.

Previous studies have shown that increasing age and the presence of long-term conditions are independently associated with an increase in polypharmacy prevalence. [3-5] Comparatively fewer studies have examined whether socio-demographic or lifestyle factors, for example wealth and obesity, are independently associated with polypharmacy. The existing studies are limited by their small sample sizes and data collection methods. [6-9] In a study conducted by Haider et al, [6] no statistically significant association between polypharmacy and an individual’s socio-economic status was established. The findings from a study by Rajska-Neumann [7] revealed that there was no statistically significant difference in polypharmacy prevalence between smokers and non-smokers; whereas a statistically significant inverse relationship between alcohol consumption and the concomitant administration of medications was detected by Wong et al. [8] Finally, when Bueno et al [9] examined the association between polypharmacy and obesity, an adjusted odds ratio revealed that obese individuals (BMI >30kg/m<sup>2</sup>) were 1.6 times more likely to be experiencing polypharmacy, compared to individuals with a BMI less than 30kg/m<sup>2</sup>. To advance knowledge on this topic, and to identify the current and future drivers of polypharmacy, a larger-scale, population based study is required.

This study used data from The English Longitudinal Study of Ageing (ELSA) as this provided an opportunity to link polypharmacy and hyper-polypharmacy data to participants’ personal data. In particular, this study aimed to determine whether wealth, BMI, smoking and

1  
2  
3 alcohol consumption, age and the presence of long-standing conditions, are driving  
4 polypharmacy (5-9 prescribed medications) and hyper-polypharmacy (>10 prescribed  
5 medications) prevalence in a community population of older people living in England.  
6

## 7 **METHOD**

### 8 **Sample and participants**

9  
10 A cross-sectional study was conducted using Wave 6 data from The English Longitudinal  
11 Study of Ageing (ELSA). Data collection took place between May 2012 and June 2013, from  
12 a representative sample of the English population who were aged 50 years or above.  
13

14 Since ELSA began in 2002, participants have been asked to provide personal information  
15 about their household finances, health status, lifestyle choices and social interactions, on a bi-  
16 annual basis. To be included in ELSA Wave 6, participants must have been successfully  
17 interviewed in one or more of the previous ELSA Waves. Also, they must have been aged  
18 over 50 at the time of study enrollment and living at private residential addresses in England.  
19 [10]  
20  
21

### 22 **Patient Involvement and Ethics**

23  
24 This study only used data from the ELSA database. No patients were involved in the  
25 development of the research question, study design or interpretation of data in this study.  
26 Ethical approval was not required for this study.  
27

### 28 **Data Collection**

#### 29 **Face-to-face interviews**

30  
31 The face-to-face interviews were conducted by trained interviewers, who asked participants  
32 to provide information about their current lifestyle choices, including smoking habits and  
33 alcohol consumption over the past twelve months. Smoking status was recorded as current  
34 smoker or non-smoker; whereas, the frequency of alcohol consumption over the past year  
35 was recorded as never, rarely, frequently or very frequently. [12] Rarely was defined as  
36 drinking alcohol less than twice a month. Frequently was defined as drinking alcohol between  
37 one and four times a week; whilst, very frequently was defined as drinking alcohol at least  
38 five times a week.  
39  
40

41 Participants were also asked to describe their current health status. Participants could select  
42 one of the following options: “excellent, very good, good, fair or poor”. [13] These responses  
43 were converted into a two-level variable: good/fair and poor, with good/fair health status  
44 being the sum of responses ranging from “excellent” to “fair”. In a subsequent question,  
45 participants were asked whether they had any long-standing illness, disability or infirmity.  
46 When the latter question was asked, the interviewers defined long-standing as “anything that  
47 has troubled you over a period of time, or that is likely to affect you over a period of time”,  
48 and participants could answer this question with either yes or no. [13]  
49  
50

51 Finally, participants were asked to provide information about their household income,  
52 including information about their employment status, personal finances, assets, pensions and  
53 other benefits. Participant pension data was excluded when wealth index scores were  
54 calculated. Based upon their wealth index scores, participants were allocated to one of five  
55 wealth quintiles. Quintile 1 was the most affluent, whilst quintile 5 was the poorest.  
56  
57

## Questionnaire

After completion of the face-to-face interview, participants were asked to complete a paper-based questionnaire. The questionnaire was designed to obtain further information about the participants' living arrangements, health status, lifestyle choices and social interactions. [14]

## Nurse visit

The nurse visits took place in the participant's home. At the beginning of the visit, the nurse recorded information about participant demographics and their currently prescribed medications. Prescribed medication formulations were defined by the nurses as "pills, syrups, ointments, inhalers or injections". [15] If a participant reported taking one or more prescribed medications, the nurse sought their permission to record the name of their medication, in addition to seeing its container. A nurse could record a maximum of 27 prescribed medications. During the latter part of the visit, the nurse conducted a physical examination and recorded information about the participant's blood pressure, grip strength, height, weight and lung function. [15] Using a participant's height and weight data, it was possible to calculate their body mass index. A BMI  $<18.5\text{kg/m}^2$  was recorded as underweight, a BMI value between  $18.5-24.9\text{kg/m}^2$  was considered to be normal weight; whereas, a BMI of  $25.0-29.9\text{kg/m}^2$  was recorded as overweight and a BMI  $>30\text{kg/m}^2$  was recorded as obese.

## Inclusion Criteria

All participants must have completed a face-to-face interview, a paper-based questionnaire and received a nurse visit during ELSA wave 6 to meet the inclusion criteria for this study. [11]

## Defining polypharmacy and hyper-polypharmacy

Polypharmacy was defined as the concurrent use of five to nine prescribed medications, whilst hyper-polypharmacy was defined as the concurrent use of ten or more prescribed medications. These definitions have been used previously in other population based studies. [2,16]

## Data analysis

Initially, descriptive statistics were used to summarise the prevalence of polypharmacy and hyper-polypharmacy among participants. These data were subsequently stratified according to participant demographics. In the second part of the analysis, a bivariate model was used to assess the relationship between polypharmacy and the following independent variables: frequent alcohol consumption, increasing age, poor wealth, female sex, smoking, raised body mass index (BMI), poor self-rated health and the presence of a long-standing condition.

In the final part of the analysis, two multivariate models were created to identify associations between participant characteristics and polypharmacy prevalence. In both models, ill health was controlled for by using participants taking between one and four prescribed medications. This group of participants formed the control group. Participants taking no prescribed medications were excluded from this part of the analysis. In the first model, participants taking 5 to 9 medications were compared to the control group. In the second model, participants taking 10 or more medications were compared to the control group. Hazard ratios with corresponding 95% confidence intervals (CI), for polypharmacy and hyper-

polypharmacy, were calculated after adjusting for covariates. The following factors were considered as covariates: gender, age, wealth, smoking, alcohol consumption, BMI, self-rated health and the presence of long-standing conditions. The data generated from the models was statistically significant if  $p < 0.05$ . All data analysis was undertaken using SPSS version 24.0.

## RESULTS

### Participant Characteristics:

A total of 7730 participants' data from ELSA Wave 6 were analysed. Participant characteristics are presented in Table 1. The mean age of participants in Wave 6 was 67.6 years, and 55.4% ( $n=4282/7730$ ) of the sample were female. Overall, 24.1% ( $n=1862/7730$ ) of the participants received polypharmacy and 6.4% ( $n=494/7730$ ) were receiving hyper-polypharmacy (Table 1). The proportion of individuals receiving polypharmacy and hyper-polypharmacy increased steadily with age. However, the prevalence of polypharmacy and hyper-polypharmacy in males and females was similar. (Table 1)

|                                     | No medications | 1-4 medications | 5-9 medications     | 10+ medications           |
|-------------------------------------|----------------|-----------------|---------------------|---------------------------|
| <b>Participant Characteristics:</b> |                |                 | <b>Polypharmacy</b> | <b>Hyper-polypharmacy</b> |
| All participants ( $n=7730$ )       | 23.8%          | 45.7%           | 24.1%               | 6.4%                      |
| <b>Age:</b>                         |                |                 |                     |                           |
| 50-59 years ( $n=1695$ )            | 43.2%          | 42.4%           | 11.7%               | 2.7%                      |
| 60-69 years ( $n=3012$ )            | 26.6%          | 49.2%           | 19.6%               | 4.6%                      |
| 70-79 years ( $n=2114$ )            | 11.8%          | 45.9%           | 33.1%               | 9.2%                      |
| 80+ years ( $n=909$ )               | 6.4%           | 39.6%           | 41.3%               | 12.7%                     |
| <b>Gender:</b>                      |                |                 |                     |                           |
| Male ( $n=3448$ )                   | 24.9%          | 44.6%           | 24.4%               | 6.1%                      |
| Female ( $n=4282$ )                 | 22.9%          | 46.6%           | 23.9%               | 6.6%                      |
| <b>Long-standing condition:</b>     |                |                 |                     |                           |
| Yes ( $n=4289$ )                    | 9.6%           | 44.5%           | 35.2%               | 10.7%                     |
| No ( $n=3441$ )                     | 41.6%          | 47.1%           | 10.3%               | 1.0%                      |

**Table 1: Polypharmacy versus patient characteristics**

Overall, 35.2% ( $n=1509/4289$ ) of participants who reported a long-standing condition were receiving polypharmacy; whereas, 10.7% ( $n=459/4289$ ) were receiving hyper-polypharmacy. Only 10.3% ( $n=353/3441$ ) and 1.0% ( $n=35/3441$ ) of participants with no long-standing conditions, received polypharmacy and hyper-polypharmacy respectively (Table 1).

In a bivariate model, moderate positive correlations were detected between polypharmacy and the following variables: the presence of a long-standing condition, poor self-rated health and increasing age. A weak positive correlation between polypharmacy and a high BMI was established. Similarly, there was a weak positive correlation between lower wealth and polypharmacy. No correlation between gender and polypharmacy was established. In addition, there was a weak negative correlation between polypharmacy and smoking. There was also a weak negative correlation between polypharmacy and frequent alcohol consumption. All bivariate correlations are presented in Figure 1.



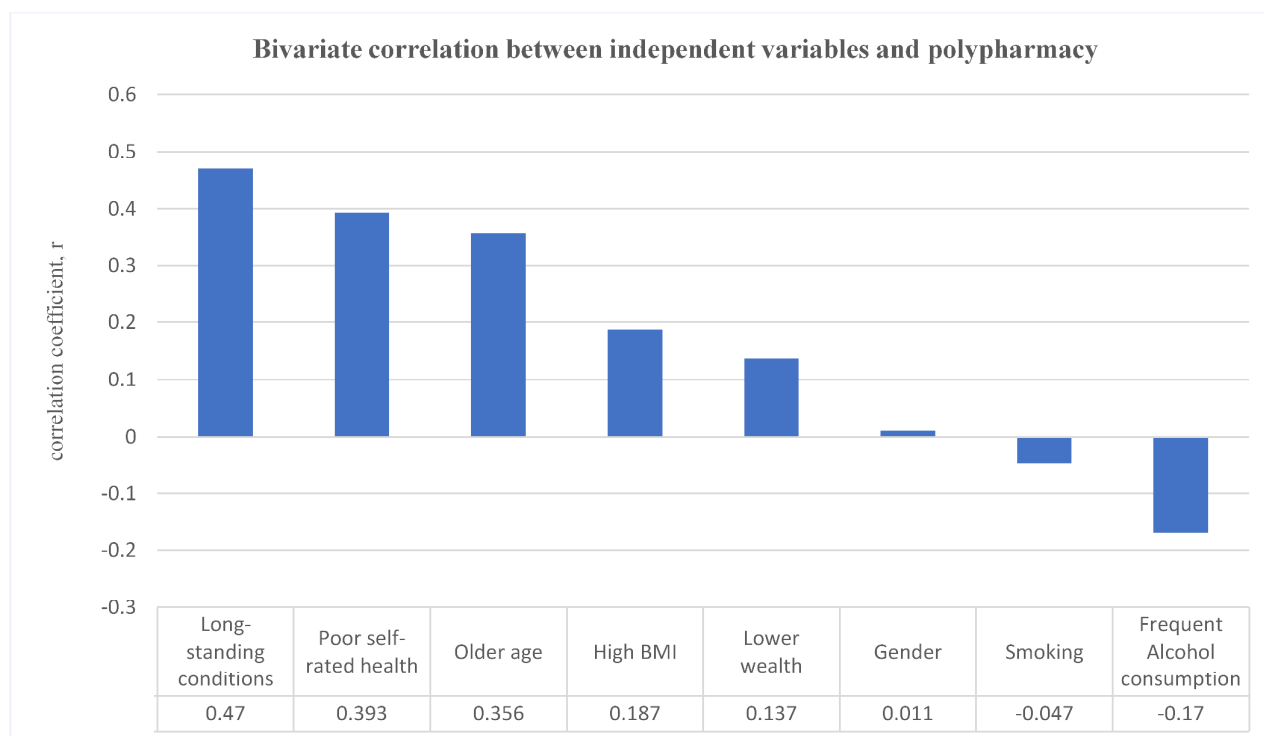

**Figure 1: Bivariate correlations between polypharmacy and covariates**

To determine whether other variables are driving polypharmacy and hyper-polypharmacy, the results from the two multivariate models (Polypharmacy-1 and Hyper-polypharmacy-2) were analysed and presented in Table 2 and Table 3 respectively.

| Independent Variables                       | Adjusted HR | 95% CI |       | Sig.  |
|---------------------------------------------|-------------|--------|-------|-------|
|                                             |             | Lower  | Upper |       |
| <b>Age</b>                                  |             |        |       |       |
| 50-59 years (Reference)                     | 1           |        |       |       |
| 60-69 years                                 | 1.66        | 1.37   | 2.01  | <0.00 |
| 70-79 years                                 | 3.42        | 2.81   | 4.77  | <0.00 |
| 80+                                         | 4.52        | 3.58   | 5.70  | <0.00 |
| <b>Gender</b>                               |             |        |       |       |
| Male (Reference)                            | 1           |        |       |       |
| Female                                      | 0.92        | 0.81   | 1.04  | 0.21  |
| <b>Long-standing condition</b>              |             |        |       |       |
| No (Reference)                              | 1           |        |       |       |
| Yes                                         | 2.94        | 2.55   | 3.39  | 0.00  |
| <b>Self-rated health</b>                    |             |        |       |       |
| Self-rated health: Good (Reference)         | 1           |        |       |       |
| Self-rated health: Poor                     | 2.98        | 2.61   | 3.4   | 0.00  |
| <b>Wealth</b>                               |             |        |       |       |
| Wealth: Quintile 1 (wealthiest) (Reference) | 1           |        |       |       |
| Wealth: Quintile 2                          | 1.08        | 0.9    | 1.31  | 0.37  |
| Wealth: Quintile 3                          | 1.13        | 0.93   | 1.37  | 0.19  |
| Wealth: Quintile 4                          | 1.23        | 1.02   | 1.5   | 0.03  |
| Wealth: Quintile 5 (poorest)                | 1.28        | 1.04   | 1.69  | 0.02  |
| <b>Body Mass Index (BMI)</b>                |             |        |       |       |
| BMI<18.5kg/m <sup>2</sup> : underweight     | 0.93        | 0.5    | 1.74  | 0.83  |

|                                                                |      |      |      |             |
|----------------------------------------------------------------|------|------|------|-------------|
| BMI 18.5 -24.9 kg/m <sup>2</sup> : normal ( <b>Reference</b> ) | 1    |      |      |             |
| BMI 25.0-29.9kg/m <sup>2</sup> : overweight                    | 1.13 | 0.96 | 1.33 | 0.13        |
| BMI >30kg/m <sup>2</sup> : obese                               | 1.81 | 1.53 | 2.15 | <b>0.00</b> |
| <b>Current smoking habits since last ELSA interview</b>        |      |      |      |             |
| Non-smoker ( <b>Reference</b> )                                | 1    |      |      |             |
| Smoker                                                         | 1.06 | 0.86 | 1.29 | 0.56        |
| <b>Alcohol consumption in past 12 months</b>                   |      |      |      |             |
| Never ( <b>Reference</b> )                                     | 1    |      |      |             |
| Rarely                                                         | 0.76 | 0.61 | 0.94 | <b>0.01</b> |
| Frequently                                                     | 0.65 | 0.53 | 0.79 | <b>0.00</b> |
| Very frequently                                                | 0.64 | 0.52 | 0.78 | <b>0.00</b> |

**Table 2: Model 1: Independent variables in polypharmacy (5-9 medications) versus no polypharmacy (1-4 medications)**

| Independent Variables                                          | Adjusted HR | 95% CI |       | Sig.          |
|----------------------------------------------------------------|-------------|--------|-------|---------------|
|                                                                |             | Lower  | Upper |               |
| <b>Age</b>                                                     |             |        |       |               |
| 50-59 years ( <b>Reference</b> )                               | 1           |        |       |               |
| 60-69 years                                                    | 1.79        | 1.21   | 2.64  | < <b>0.00</b> |
| 70-79 years                                                    | 4.11        | 2.77   | 6.09  | < <b>0.00</b> |
| 80+                                                            | 5.94        | 3.79   | 9.29  | < <b>0.00</b> |
| <b>Gender</b>                                                  |             |        |       |               |
| Male ( <b>Reference</b> )                                      | 1           |        |       |               |
| Female                                                         | 0.94        | 0.71   | 1.15  | 0.41          |
| <b>Long standing condition</b>                                 |             |        |       |               |
| No ( <b>Reference</b> )                                        | 1           |        |       |               |
| Yes                                                            | 5.30        | 3.63   | 7.73  | <b>0.00</b>   |
| <b>Self-rated health</b>                                       |             |        |       |               |
| Self-rated health: Good ( <b>Reference</b> )                   | 1           |        |       |               |
| Self-rated health: Poor                                        | 6.69        | 5.21   | 8.58  | <b>0.00</b>   |
| <b>Wealth</b>                                                  |             |        |       |               |
| Wealth: Quintile 1 (wealthiest) ( <b>Reference</b> )           | 1           |        |       |               |
| Wealth: Quintile 2                                             | 1.41        | 0.93   | 2.13  | 0.11          |
| Wealth: Quintile 3                                             | 1.36        | 0.90   | 2.06  | 0.15          |
| Wealth: Quintile 4                                             | 1.75        | 1.17   | 2.60  | <b>0.006</b>  |
| Wealth: Quintile 5 (poorest)                                   | 2.04        | 1.34   | 3.11  | <b>0.001</b>  |
| <b>Body Mass Index (BMI)</b>                                   |             |        |       |               |
| BMI<18.5kg/m <sup>2</sup> : underweight                        | 0.88        | 0.26   | 2.95  | 0.83          |
| BMI 18.5 -24.9 kg/m <sup>2</sup> : normal ( <b>Reference</b> ) | 1           |        |       |               |
| BMI 25.0-29.9kg/m <sup>2</sup> : overweight                    | 1.38        | 0.98   | 1.95  | 0.07          |
| BMI >30kg/m <sup>2</sup> : obese                               | 2.28        | 1.63   | 3.21  | <b>0.00</b>   |
| <b>Current smoking habits since last ELSA interview</b>        |             |        |       |               |
| Non-smoker ( <b>Reference</b> )                                | 1           |        |       |               |
| Smoker                                                         | 0.98        | 0.68   | 1.39  | 0.89          |

| Alcohol consumption in past 12 months |      |      |      |              |
|---------------------------------------|------|------|------|--------------|
| Never (Reference)                     | 1    |      |      |              |
| Rarely                                | 0.70 | 0.50 | 0.99 | <b>0.046</b> |
| Frequently                            | 0.40 | 0.29 | 0.56 | <b>0.00</b>  |
| Very frequently                       | 0.39 | 0.27 | 0.55 | <b>0.00</b>  |

**Table 3: Model 2: Independent variables in hyper-polypharmacy (10+ medications) versus no polypharmacy (1-4 medications)**

### Examining the association between age and polypharmacy

In both models, increasing age was associated with polypharmacy and hyper-polypharmacy. For participants aged between 70 years and 79 years, the adjusted hazard ratio for polypharmacy was 3.42 (2.81 to 4.77,  $p < 0.001$ ) (Table 2). This value increased to 4.52 (3.58 to 5.70,  $p < 0.001$ ) in participants aged above 80 years old (Table 2). Similarly, the adjusted hazard ratios for hyper-polypharmacy increased from 4.11 (2.77 to 6.09,  $p < 0.001$ ) in participants aged between 70 years and 79 years to 5.94 (3.79 to 9.29,  $p < 0.001$ ) in participants aged above 80 years old (Table 3). All findings were statistically significant.

### Examining the association between the presence of a long-standing condition and polypharmacy

The adjusted hazard ratio for polypharmacy and the presence of a long-standing condition was 2.94 (2.55 to 3.39,  $p < 0.001$ ) (Table 2); whereas, the adjusted hazard ratio for hyper-polypharmacy and the presence of a long-standing condition was 5.30 (3.63 to 7.73,  $p < 0.001$ ) (Table 3). In both models, statistically significant results were generated.

### Examining the association between wealth and polypharmacy

The adjusted hazard ratio for polypharmacy increased from 1.08 (0.9 to 1.31,  $p = 0.37$ ) in wealth quintile 2 to 1.28 (1.04 to 1.69,  $p = 0.02$ ) in wealth quintile 5 (Table 2). Similarly, the adjusted hazard ratio for hyper-polypharmacy increased from 1.41 (0.93 to 2.13,  $p = 0.11$ ) in wealth quintile 2 to 2.04 (1.34 to 3.11,  $p = 0.001$ ) in wealth quintile 5 (Table 3). In both models, statistically significant differences in adjusted hazard ratios for polypharmacy and hyper-polypharmacy were detected in the lower wealth quintiles (quintile 4 and 5).

### Examining the association between BMI and polypharmacy

In underweight participants, the adjusted hazard ratio for polypharmacy was 0.93 (0.5 to 1.74,  $p = 0.83$ ) (Table 2); whereas, the adjusted hazard ratios for polypharmacy in participants who were overweight or obese were 1.13 (0.96 to 1.33,  $p = 0.13$ ) and 1.81 (1.53 to 2.15,  $p < 0.001$ ) respectively (Table 2). Adjusted hazard ratios for hyper-polypharmacy produced similar results. In underweight participants, the adjusted hazard ratio for hyper-polypharmacy decreased to 0.88 (0.26 to 2.95,  $p = 0.83$ ) (Table 3); whereas, the adjusted hazard ratio for hyper-polypharmacy in overweight participants was 1.38 (0.98 to 1.95,  $p = 0.07$ ) increasing substantially to 2.28 (1.63 to 3.21,  $p < 0.001$ ) in obese participants (Table 3). Only the adjusted hazard ratios for polypharmacy and hyper-polypharmacy, in relation to obesity, produced statistically significant results.

### Examining the association between smoking and polypharmacy

1  
2  
3 The adjusted hazard ratio for polypharmacy and smoking was 1.06 (0.86 to 1.29, p=0.56)  
4 (Table 2) whereas the adjusted hazard ratio for hyper-polypharmacy and smoking was 0.98  
5 (0.68 to 1.39, p=0.89) (Table 3). Both models failed to produce any statistically significant  
6 results.  
7

### 8 **Examining the association between alcohol consumption and polypharmacy**

9

10 Adjusted hazard ratios for polypharmacy and hyper-polypharmacy were calculated using the  
11 participant's alcohol consumption data provided during the face-to-face interview. When  
12 compared to individuals who reported never drinking alcohol, the adjusted hazard ratio for  
13 participants who reported rarely consuming alcohol was 0.76 (0.61 to 0.94, p=0.01) (Table  
14 2). This value decreased further to 0.64 (0.52 to 0.78, p<0.001) in participants who reported  
15 drinking alcohol very frequently (Table 2). The adjusted hazard ratios for hyper-  
16 polypharmacy produced similar results. For participants who reported rarely consuming  
17 alcohol, the adjusted hazard ratio for hyper-polypharmacy was 0.70 (0.50 to 0.99, p=0.046),  
18 when compared to individuals who reported never drinking alcohol (Table 3); whereas the  
19 adjusted hazard ratio for hyper-polypharmacy in participants who reported drinking alcohol  
20 frequently was 0.39 (0.27 to 0.55, p<0.001) (Table 3). All adjusted hazard ratios for  
21 polypharmacy and hyper-polypharmacy, in relation to self-reported alcohol consumption,  
22 were statistically significant.  
23  
24

### 25 **DISCUSSION**

26

27 This study confirms that increasing age and the presence of long-standing conditions are  
28 driving polypharmacy prevalence, but also that obesity and lower wealth are independently  
29 associated with polypharmacy. Frequent alcohol consumption is inversely associated with  
30 polypharmacy prevalence. Results from previous studies, which have investigated the  
31 influence of ageing and long-standing conditions on polypharmacy prevalence, complement  
32 our findings. [16,17].  
33  
34

35 In the existing literature, very few studies have investigated whether polypharmacy  
36 prevalence is associated with wealth or BMI. [18,19] One study conducted in Rome, analysed  
37 a national prescription database and a multivariate model was used to identify participant  
38 characteristics which influenced polypharmacy prevalence. [18] The authors concluded that  
39 individuals living in lower socio-economic areas are 33% more likely to experience  
40 polypharmacy compared to individuals living in higher socio-economic areas. In our study,  
41 participants were allocated to one of five wealth quintiles, based upon their wealth index  
42 scores. Participants living in the lowest wealth quintiles were 28% more likely to experience  
43 polypharmacy and twice as likely to experience hyper-polypharmacy, when compared to  
44 participants living in the highest wealth quintile. Our findings were statistically significant,  
45 showing that lower wealth is independently associated with an increase in polypharmacy and  
46 hyper-polypharmacy prevalence. This finding is important because the latest figures  
47 published by the Office of National Statistics [19] show that wealth inequalities across the  
48 United Kingdom (UK) have begun to rise again, after a decade-long decline and thus, a  
49 widening gap between the UK's wealthiest and poorest households will further drive  
50 polypharmacy and hyper-polypharmacy prevalence.  
51  
52  
53

54 Our multivariate model also revealed that obesity (body mass index >30kg/m<sup>2</sup>) was another  
55 independent driver of polypharmacy and hyper-polypharmacy prevalence. This finding was  
56  
57

1  
2  
3 statistically significant. The same association was identified during another study; however,  
4 the authors did not comment on the statistical significance of their results, nor did they  
5 conduct any further research into the association. [20] Identifying the association between  
6 polypharmacy and obesity is also important because obesity has become a major public  
7 health concern in England. Assuming the current obesity epidemic continues as predicted, the  
8 prevalence of polypharmacy and hyper-polypharmacy among older people in England, is  
9 likely to follow suit. [21]

11 This study found no statistically significant association between smoking and polypharmacy.  
12 Similarly, there were no statistically significant association between smoking and hyper-  
13 polypharmacy. Our findings are supported by Rajska-Neumann [7] and Henderson et al [22].  
14 However, another study reports that smoking is inversely associated with polypharmacy  
15 (adjusted OR 0.42;95%CI,0.33-0.53). [23]

18 Frequent alcohol consumption in the past year was inversely associated with polypharmacy  
19 and hyper-polypharmacy prevalence. This finding is consistent with previous work, involving  
20 ELSA, which reported that self-reported alcohol consumption (even at high levels) was not  
21 related to poor self-rated health. [24,25] The alcohol findings in this current study could be  
22 explained by the sick quitter hypothesis, where individuals stop or reduce their alcohol  
23 consumption due to illness. [26] However, Rimm and Moats [27] conclude that the sick  
24 quitter hypothesis has been refuted by a wide range of evidence. The inverse association  
25 between alcohol consumption and polypharmacy was also detected by Incalzi et al [23]  
26 although they appear to discount a genuine association and rather attribute this to bias (i.e.  
27 patients in better health are less motivated to correct unhealthy habits).

30 Finally, most of the existing literature suggests that females take more medications compared  
31 to males; however, our study found that there was no statistically significant difference in  
32 polypharmacy and hyper-polypharmacy prevalence between males and females. [28,29,30]  
33 Pan et al [31] provides support for our findings and concluded that female sex is not  
34 independently associated with an increased polypharmacy prevalence.

37 To our knowledge this is the first study which has used medication data, from a large  
38 representative sample of older adults, to determine whether lower wealth, obesity, smoking,  
39 alcohol consumption, in addition to increasing age and the presence of long-standing  
40 conditions, are independently driving polypharmacy and hyper-polypharmacy prevalence in  
41 primary care. All analysed data was obtained using standardised data collection methods and  
42 validated data collection tools. Also, this study used a large number of covariates, which  
43 reduced the impact of confounders and minimised study bias.

45 This study has several limitations though. During the nurse visit, participants were asked  
46 about their prescribed medications; however, medications purchased without prescription, for  
47 example weak analgesics or antihistamines, were not recorded. In addition, when the nurse  
48 enquired about prescribed medications, they asked the following question: "Are you taking or  
49 using any medications, pills, syrups, ointments, puffers or injections prescribed to you by a  
50 doctor or a nurse?" [16] This question refers to some medicinal formulations, but the list is  
51 not exhaustive. Thus, a participant using eye drops or wearing a transdermal patch may not  
52 have reported this medication as the formulation was not explicitly stated in the question.  
53 Therefore, actual medication use may have been higher than recorded medication use,  
54 resulting in an underestimation of polypharmacy and hyper-polypharmacy prevalence. Also,

1  
2  
3 to obtain data about several covariates including smoking habits and alcohol consumption,  
4 participants were asked to self-report. This method of data collection relies on all participants  
5 accurately and truthfully recalling information to prevent bias. [32] Finally, it is not possible  
6 to determine the direction of causality from our data, due to the cross-sectional nature of the  
7 study.  
8

## 9 **CONCLUSION**

10  
11 This study has identified that lower wealth, obesity, increasing age and the presence of long-  
12 standing conditions are all independently driving polypharmacy and hyper-polypharmacy  
13 prevalence, among older people in primary care. An inverse relationship between frequent  
14 alcohol consumption and polypharmacy prevalence was also established. In the future, the  
15 effect of obesity and lower wealth on polypharmacy and hyper-polypharmacy prevalence is  
16 likely to become more pronounced, as the gap in UK wealth inequalities begins to widen  
17 again and the UK obesity epidemic continues. Future exploratory work is required to  
18 determine the causation behind these associations.  
19  
20  
21

---

## 22 **WHAT IS ALREADY KNOWN ABOUT THIS TOPIC**

- 23 • The prevalence of polypharmacy and hyper-polypharmacy is increasing globally
- 24 • Increasing age and the presence of long-term conditions are independently associated
- 25 with an increase in polypharmacy prevalence.
- 26 • Few studies have examined whether socio-demographic or lifestyle factors, for
- 27 example wealth and obesity, are independently associated with polypharmacy.
- 28
- 29
- 30
- 31
- 32

## 33 **WHAT THIS STUDY ADDS**

- 34 • Obesity and lower wealth have been identified as factors which independently drive
- 35 polypharmacy and especially hyper-polypharmacy.
- 36 • Frequent alcohol consumption is inversely associated with polypharmacy and hyper-
- 37 polypharmacy prevalence.
- 38
- 39
- 40
- 41
- 42

---

## 43 **ACKNOWLEDGEMENTS**

44  
45 The authors would like to thank the ELSA participants, the ELSA researchers and the UK  
46 Data Service for enabling the use of ELSA data for this analysis.  
47

## 48 **CONTRIBUTORSHIP STATEMENT**

49  
50 All authors contributed to the study idea. MF led the study and conducted all data analysis.  
51 All authors had full access to ELSA Wave 6 data, supplied by the UK Data Service and they  
52 take full responsibility for the integrity and accurate analysis of data. All authors contributed  
53 to data interpretation. NS drafted the manuscript with contributions from MF, RV and SW.  
54 NS and MF are the Guarantors for this study.  
55

## 56 **TRANSPARENCY STATEMENT**

57  
58 12  
59

NS and MF confirm that the manuscript is an honest, accurate and transparent account of the study being reported. No important aspects of this study have been omitted.

**COMPETING INTERESTS** All authors have completed the ICMJE form for disclosure of potential conflicts of interest available from [www.icmje.org/coi\\_disclosure.pdf](http://www.icmje.org/coi_disclosure.pdf) and declare that there is nothing to disclose.

**FUNDING** This study received no specific funding

**DATA SHARING STATEMENT** No additional data is available

**COPYRIGHT/LICENSE FOR PUBLICATION:** The Corresponding Author has the right to grant on behalf of all authors and does grant on behalf of all authors, *a worldwide license* to the Publishers and its licensees in perpetuity, in all forms, formats and media (whether known now or created in the future), to i) publish, reproduce, distribute, display and store the Contribution, ii) translate the Contribution into other languages, create adaptations, reprints, include within collections and create summaries, extracts and/or, abstracts of the Contribution, iii) create any other derivative work(s) based on the Contribution, iv) to exploit all subsidiary rights in the Contribution, v) the inclusion of electronic links from the Contribution to third party material where-ever it may be located; and, vi) license any third party to do any or all of the above.

## REFERENCES

1. Duerden M, Payne R. Polypharmacy – what is it and how common is it? *Prescriber*. 2014 Nov
2. Guthrie B, Makubate B, Hernandez-Santiago V, Dreischulte T. The rising tide of polypharmacy and drug-drug interactions: population database analysis 1995–2010. *BMC Med* 2015;13:74
3. The Dynamics of Ageing. Evidence from the English Longitudinal Study of Ageing (Wave 7) 2002-2015. Available from [www.ifs.org.uk/uploads/elsa/docs\\_w7/report.pdf](http://www.ifs.org.uk/uploads/elsa/docs_w7/report.pdf) [Accessed 27/07/2017]
4. Department of Health. Long Term Condition Compendium of Information. Third Edition. 2012 [www.gov.uk/government/uploads/attachment\\_data/file/216528/dh\\_134486.pdf](http://www.gov.uk/government/uploads/attachment_data/file/216528/dh_134486.pdf) [Accessed 27/07/2017]
5. Silveira EA, Dalastra L, Pagotto V. Polypharmacy, chronic diseases and nutritional markers in community-dwelling older. *Revista Brasileira de Epidemiologia*. 2014 Dec;17(4):818-29.
6. Haider SI, Johnell K, Thorslund M, Fastbom J. Analysis of the association between polypharmacy and socioeconomic position among elderly aged  $\geq 77$  years in Sweden. *Clinical therapeutics*. 2008 Feb 1;30(2):419-27.
7. Rajska-Neumann A, Szymański M, Balcer N, Grześkowiak E, Szalek E, Wieczorowska-Tobis K. Is smoking a determinant of polypharmacy among elderly subject?. *Przegląd lekarski*. 2004 Dec;62(10):1145-7.
8. Wong H, Heuberger R, Logomarsino J, Hewlings S. Associations between alcohol use, polypharmacy and falls in older adults: Helen Wong and colleagues report on a cross-sectional study into alcohol consumption, medication use and falls in the community. *Nursing older people*. 2016 Jan 28;28(1):30-6.
9. Bueno DR, Monteiro HL, Rosa CS, Codogno JS, Fernandes RA, Marucci MF. Association between physical activity levels and polypharmacy in hypertensive patients. *Medicina (Ribeirão Preto)*. Online. 2016;49(3):240-7.
10. Wade KF, Marshall A, Vanhoutte B, Wu FC, O'Neill TW, Lee DM. Does pain predict frailty in older men and women? Findings from the English Longitudinal Study of Ageing (ELSA). *The Journals of Gerontology: Series A*. 2017 Mar 1;72(3):403-9.
11. Steptoe A, Breeze E, Banks J, Nazroo J. Cohort profile: the English longitudinal study of ageing. *International journal of epidemiology*. 2012 Nov 6;42(6):1640-8.
12. Lee DM, Nazroo J, O'Connor DB, Blake M, Pendleton N. Sexual health and well-being among older men and women in England: findings from the English Longitudinal Study of Ageing. *Archives of sexual behavior*. 2016 Jan 1;45(1):133-44.

13. Nat Cen Social Research. English Longitudinal Study of Ageing Wave 6 interview questionnaire. Version 3.0 Available from [https://www.elsa-project.ac.uk/uploads/elsa/docs\\_w6/main\\_questionnaire.pdf](https://www.elsa-project.ac.uk/uploads/elsa/docs_w6/main_questionnaire.pdf) [Accessed 5/9/2017]
14. English Longitudinal Study of Ageing Health and Lifestyles of People aged 50 or over. Self-completion questionnaire. Available from [https://www.elsa-project.ac.uk/uploads/elsa/docs\\_w6/self\\_completion\\_main.pdf](https://www.elsa-project.ac.uk/uploads/elsa/docs_w6/self_completion_main.pdf) [Accessed 5/9/2017]
15. Nat Cen Social Research. English Longitudinal Study of Ageing Wave 6 Nurse questionnaire. 2012-2013. Available from [https://www.elsa-project.ac.uk/uploads/elsa/docs\\_w6/nurse\\_documentation.pdf](https://www.elsa-project.ac.uk/uploads/elsa/docs_w6/nurse_documentation.pdf) [Accessed 5/9/2017]
16. Bjerrum L, Søgaard J, Hallas J, Kragstrup J. Polypharmacy: correlations with sex, age and drug regimen A prescription database study. *European journal of clinical pharmacology*. 1998 Jun 1;54(3):197-202
17. The Irish Longitudinal Study of Ageing. Main Questionnaire 2010. Available from <http://www.ucd.ie/issda/static/documentation/tilda/tilda-capi-qaire-wave1.pdf> [Accessed 5/9/2017]
18. Fano V, Chini F, Pezzotti P, Bontempi K. Estimating the Prevalence and the Determinants of Polypharmacy Using Data from a Health Administrative Database: A Comparison of Results Obtained Employing Different Algorithms. *Advances in Pharmacoepidemiology & Drug Safety*. 2014;3(151):2167-1052.
19. The Office of National Statistics Report: Chapter 2 Total Wealth, Wealth in GB, 2012-2014. Available from <http://webarchive.nationalarchives.gov.uk/20160105170657/http://www.ons.gov.uk/ons/rel/was/wealth-in-great-britain-wave-4/2012-2014/rpt-chapter-2.html>
20. Team CP. The impact of obesity on drug prescribing in primary care. *The British Journal of General Practice*. 2005 Oct 1;55(519):743.
21. Wang YC, McPherson K, Marsh T, Gortmaker SL, Brown M. Health and economic burden of the projected obesity trends in the USA and the UK. *The Lancet*. 2011 Sep 2;378(9793):815-25.
22. Henderson JA, Buchwald D, Manson SM. Relationship of medication use to health-related quality of life among a group of older American Indians. *Journal of applied gerontology*. 2006 Feb;25(1\_suppl):89S-104S.
23. Incalzi RA, Corsonello A, Pedone C, Corica F, Carbonin P. Depression and drug utilization in an elderly population. *Therapeutics and clinical risk management*. 2005 Mar;1(1):55.
24. Frisher M, Mendonça M, Shelton N, Pikhart H, de Oliveira C, Holdsworth C. Is alcohol consumption in older adults associated with poor self-rated health? Cross-sectional and longitudinal analyses from the English Longitudinal Study of Ageing. *BMC public health*. 2015 Jul 24;15(1):703.
25. Holdsworth C, Mendonca M, Pikhart H, Frisher M, de Oliveira C, Shelton N. Is regular drinking in later life an indicator of good health? Evidence from the English Longitudinal Study of Ageing. *J Epidemiol Community Health* 2016 Aug 1;70(8):764-70
26. Shaper AG, Wannamethee G, Walker M. Alcohol and mortality in British men: Explaining the U-shaped curve. *Lancet*. 1988; 2:1267-1273.
27. Rimm EB, Moats C. Alcohol and coronary heart disease: drinking patterns and mediators of effect. *Annals of Epidemiology*. 2007. May 31; 17(5): S3-7
28. Kaufman DW, Kelly JP, Rosenberg L, Anderson TE, Mitchell AA. Recent patterns of medication use in the ambulatory adult population of the United States: the Slone survey. *Jama*. 2002 Jan 16;287(3):337-44.
29. Schuler J, Dückelmann C, Beindl W, Prinz E, Michalski T, Pichler M. Polypharmacy and inappropriate prescribing in elderly internal-medicine patients in Austria. *Wiener klinische Wochenschrift*. 2008 Dec 1;120(23):733-41.
30. Wauters M, Elseviers M, Vaes B, Degryse J, Dalleur O, Vander Stichele R, Van Bortel L, Azermai M. Polypharmacy in a Belgian cohort of community-dwelling oldest old (80+). *Acta Clinica Belgica*. 2016 May 3;71(3):158-66.
31. Pan HH, Li CY, Chen TJ, Su TP, Wang KY. Association of polypharmacy with fall-related fractures in older Taiwanese people: age-and gender-specific analyses. *BMJ open*. 2014 Mar 1;4(3): e004428. Depression and drug utilization in an elderly population
32. Barker, C., Pistrang, N. and Elliott, R. (2002) *Self-Report Methods*, in *Research Methods in Clinical Psychology: An Introduction for Students and Practitioners*, Second Edition, John Wiley & Sons, Ltd, Chichester, UK. doi: 10.1002/0470013435.ch6



1  
2  
3  
4  
5  
6  
7  
8  
9  
10  
11  
12  
13  
14  
15  
16  
17  
18  
19  
20  
21  
22  
23  
24  
25  
26  
27  
28  
29  
30  
31  
32  
33  
34  
35  
36  
37  
38  
39  
40  
41  
42  
43  
44  
45  
46  
47  
48  
49  
50  
51  
52  
53  
54  
55  
56  
57  
58  
59  
60

For peer review only

**SUPPLEMENTARY MATERIAL:**

Bivariate correlations between covariates

|                                     | Frequent alcohol intake | Increased age | Low wealth | Smoking | Obesity | poor self-rated health | Presence of long-standing condition | Gender (female) | Polypharmacy |
|-------------------------------------|-------------------------|---------------|------------|---------|---------|------------------------|-------------------------------------|-----------------|--------------|
| Frequent alcohol intake             | 1                       | -0.106        | -0.251     | -0.108  | -0.094  | -0.220                 | -0.137                              | -0.204          | -0.188       |
| Increased age                       | -0.106                  | 1             | -0.049     | -0.195  | -0.033  | 0.118                  | 0.141                               | 0.010           | 0.353        |
| Low wealth                          | -0.251                  | -0.049        | 1          | 0.205   | 0.135   | 0.218                  | 0.107                               | 0.059           | 0.149        |
| Smoking                             | -0.108                  | -0.195        | 0.205      | 1       | -0.117  | 0.107                  | 0.000                               | 0.044           | -0.040       |
| Obesity                             | -0.094                  | -0.033        | 0.135      | -0.117  | 1       | 0.142                  | 0.115                               | -0.030          | 0.187        |
| Poor self-rated health              | -0.220                  | 0.118         | 0.218      | 0.107   | 0.142   | 1                      | 0.407                               | -0.010          | 0.421        |
| Presence of long-standing condition | -0.137                  | 0.141         | 0.107      | 0.000   | 0.115   | 0.407                  | 1                                   | 0.006           | 0.473        |
| Gender (female)                     | -0.204                  | 0.010         | 0.059      | 0.044   | -0.030  | -0.010                 | 0.006                               | 1               | 0.011        |
| Polypharmacy                        | -0.188                  | 0.353         | 0.149      | -0.040  | 0.187   | 0.421                  | 0.473                               | 0.011           | 1            |

**STROBE 2007 (v4) Statement—Checklist of items that should be included in reports of *cross-sectional studies***

| Section/Topic                | Item # | Recommendation                                                                                                                                                                       | Reported on page # |
|------------------------------|--------|--------------------------------------------------------------------------------------------------------------------------------------------------------------------------------------|--------------------|
| <b>Title and abstract</b>    | 1      | (a) Indicate the study’s design with a commonly used term in the title or the abstract                                                                                               | 1                  |
|                              |        | (b) Provide in the abstract an informative and balanced summary of what was done and what was found                                                                                  | 2                  |
| <b>Introduction</b>          |        |                                                                                                                                                                                      |                    |
| Background/rationale         | 2      | Explain the scientific background and rationale for the investigation being reported                                                                                                 | 3                  |
| Objectives                   | 3      | State specific objectives, including any prespecified hypotheses                                                                                                                     | 3                  |
| <b>Methods</b>               |        |                                                                                                                                                                                      |                    |
| Study design                 | 4      | Present key elements of study design early in the paper                                                                                                                              | 3                  |
| Setting                      | 5      | Describe the setting, locations, and relevant dates, including periods of recruitment, exposure, follow-up, and data collection                                                      | 3                  |
| Participants                 | 6      | (a) Give the eligibility criteria, and the sources and methods of selection of participants                                                                                          | 3-4                |
| Variables                    | 7      | Clearly define all outcomes, exposures, predictors, potential confounders, and effect modifiers. Give diagnostic criteria, if applicable                                             | 5                  |
| Data sources/<br>measurement | 8*     | For each variable of interest, give sources of data and details of methods of assessment (measurement). Describe comparability of assessment methods if there is more than one group | 4-5                |
| Bias                         | 9      | Describe any efforts to address potential sources of bias                                                                                                                            |                    |
| Study size                   | 10     | Explain how the study size was arrived at                                                                                                                                            | 5                  |
| Quantitative variables       | 11     | Explain how quantitative variables were handled in the analyses. If applicable, describe which groupings were chosen and why                                                         | 4-5                |
| Statistical methods          | 12     | (a) Describe all statistical methods, including those used to control for confounding                                                                                                | 5                  |
|                              |        | (b) Describe any methods used to examine subgroups and interactions                                                                                                                  | 5                  |
|                              |        | (c) Explain how missing data were addressed                                                                                                                                          | 5                  |
|                              |        | (d) If applicable, describe analytical methods taking account of sampling strategy                                                                                                   |                    |
|                              |        | (e) Describe any sensitivity analyses                                                                                                                                                |                    |
| <b>Results</b>               |        |                                                                                                                                                                                      |                    |

|                          |     |                                                                                                                                                                                                                                                                                                                                                                                                               |            |
|--------------------------|-----|---------------------------------------------------------------------------------------------------------------------------------------------------------------------------------------------------------------------------------------------------------------------------------------------------------------------------------------------------------------------------------------------------------------|------------|
| Participants             | 13* | (a) Report numbers of individuals at each stage of study—eg numbers potentially eligible, examined for eligibility, confirmed eligible, included in the study, completing follow-up, and analysed<br>(b) Give reasons for non-participation at each stage<br>(c) Consider use of a flow diagram                                                                                                               | 6          |
| Descriptive data         | 14* | (a) Give characteristics of study participants (eg demographic, clinical, social) and information on exposures and potential confounders<br>(b) Indicate number of participants with missing data for each variable of interest                                                                                                                                                                               | 6          |
| Outcome data             | 15* | Report numbers of outcome events or summary measures                                                                                                                                                                                                                                                                                                                                                          | 9-10       |
| Main results             | 16  | (a) Give unadjusted estimates and, if applicable, confounder-adjusted estimates and their precision (eg, 95% confidence interval). Make clear which confounders were adjusted for and why they were included<br>(b) Report category boundaries when continuous variables were categorized<br>(c) If relevant, consider translating estimates of relative risk into absolute risk for a meaningful time period | 7-9<br>8-9 |
| Other analyses           | 17  | Report other analyses done—eg analyses of subgroups and interactions, and sensitivity analyses                                                                                                                                                                                                                                                                                                                | 7          |
| <b>Discussion</b>        |     |                                                                                                                                                                                                                                                                                                                                                                                                               |            |
| Key results              | 18  | Summarise key results with reference to study objectives                                                                                                                                                                                                                                                                                                                                                      | 9-10       |
| Limitations              | 19  | Discuss limitations of the study, taking into account sources of potential bias or imprecision. Discuss both direction and magnitude of any potential bias                                                                                                                                                                                                                                                    | 11         |
| Interpretation           | 20  | Give a cautious overall interpretation of results considering objectives, limitations, multiplicity of analyses, results from similar studies, and other relevant evidence                                                                                                                                                                                                                                    | 12         |
| Generalisability         | 21  | Discuss the generalisability (external validity) of the study results                                                                                                                                                                                                                                                                                                                                         | 12         |
| <b>Other information</b> |     |                                                                                                                                                                                                                                                                                                                                                                                                               |            |
| Funding                  | 22  | Give the source of funding and the role of the funders for the present study and, if applicable, for the original study on which the present article is based                                                                                                                                                                                                                                                 | 13         |

\*Give information separately for cases and controls in case-control studies and, if applicable, for exposed and unexposed groups in cohort and cross-sectional studies.

**Note:** An Explanation and Elaboration article discusses each checklist item and gives methodological background and published examples of transparent reporting. The STROBE checklist is best used in conjunction with this article (freely available on the Web sites of PLoS Medicine at <http://www.plosmedicine.org/>, Annals of Internal Medicine at <http://www.annals.org/>, and Epidemiology at <http://www.epidem.com/>). Information on the STROBE Initiative is available at [www.strobe-statement.org](http://www.strobe-statement.org).

# BMJ Open

## Factors associated with polypharmacy in primary care: A cross-sectional analysis of data from The English Longitudinal Study of Ageing (ELSA)

|                                 |                                                                                                                                                                                                                                                            |
|---------------------------------|------------------------------------------------------------------------------------------------------------------------------------------------------------------------------------------------------------------------------------------------------------|
| Journal:                        | <i>BMJ Open</i>                                                                                                                                                                                                                                            |
| Manuscript ID                   | bmjopen-2017-020270.R1                                                                                                                                                                                                                                     |
| Article Type:                   | Research                                                                                                                                                                                                                                                   |
| Date Submitted by the Author:   | 28-Dec-2017                                                                                                                                                                                                                                                |
| Complete List of Authors:       | Slater, Natasha; Keele University School of Pharmacy, Pharmacy<br>White, Simon; Keele University School of Pharmacy, Pharmacy<br>Venables, Rebecca; Keele University, School of Pharmacy<br>Frisher, Martin; Keele University School of Pharmacy, Pharmacy |
| <b>Primary Subject Heading</b>: | Public health                                                                                                                                                                                                                                              |
| Secondary Subject Heading:      | Geriatric medicine                                                                                                                                                                                                                                         |
| Keywords:                       | polypharmacy, longitudinal, older people, hyper-polypharmacy                                                                                                                                                                                               |
|                                 |                                                                                                                                                                                                                                                            |

SCHOLARONE™  
Manuscripts

1

2  
3  
4  
5  
6  
7  
8  
9  
10  
11  
12  
13  
14  
15  
16  
17  
18  
19  
20  
21  
22  
23  
24  
25  
26  
27  
28  
29  
30  
31  
32  
33  
34  
35  
36  
37  
38  
39  
40  
41  
42  
43  
44  
45  
46  
47  
48  
49  
50  
51  
52  
53  
54  
55  
56  
57  
58  
59  
60

Factors associated with polypharmacy in primary care: A cross-sectional analysis of data from The English Longitudinal Study of Ageing (ELSA)

**Authors:**

Natasha Slater, Simon White, Rebecca Venables, Martin Frisher

School of Pharmacy, Keele University, Staffordshire, ST5 5BG, United Kingdom Natasha Slater PhD Student School of Pharmacy, Keele University Simon White Senior Lecturer School of Pharmacy, Keele University Rebecca Venables Lecturer School of Pharmacy, Keele University Martin Frisher Reader School of Pharmacy, Keele University

**Correspondence to:** [n.slater@keele.ac.uk](mailto:n.slater@keele.ac.uk)

1

2

**ABSTRACT:**

**OBJECTIVES:** While older age and ill-health are known to be associated with polypharmacy, this paper aims to identify whether wealth, body mass index (BMI), smoking and alcohol consumption are also contributing to polypharmacy (5-9 prescribed medications) and hyper-polypharmacy prevalence ( $\geq 10$  prescribed medications), among older people living in England.

**DESIGN:** Cross-sectional study

**SETTING:** The English Longitudinal Study of Ageing Wave 6 (2012-2013)

**PARTICIPANTS:** 7730 participants aged over 50 years old

**DATA SYNTHESIS:** Two multivariate models were created. Hazard ratios (HR) with corresponding 95% confidence intervals (CI), for polypharmacy and hyper-polypharmacy, were calculated after adjusting for gender, age, wealth, smoking, alcohol consumption, BMI, self-rated health and the presence of a chronic health condition.

**RESULTS:** Lower wealth (adjusted HR highest wealth quintile versus lowest wealth quintile, 1.28; 95%CI, 1.04-1.69,  $p=0.02$ ) and obesity (adjusted HR 1.81; 95%CI, 1.53-2.15,  $p<0.001$ ) were significantly associated with polypharmacy. Increasing age (adjusted HR 50-59 years versus 70-79 years, 3.42; 95% CI, 2.81-4.77,  $p<0.001$ ) and the presence of a chronic health condition (adjusted HR 2.94; 95%CI, 2.55-3.99,  $p<0.001$ ) were also associated with polypharmacy. No statistically significant association between smoking and polypharmacy (adjusted HR 1.06; 95% CI, 0.86-1.29,  $p=0.56$ ) was established; whilst, very frequent alcohol consumption (consuming alcohol  $>5$  times per week) was inversely associated with polypharmacy (adjusted HR never drank versus very frequently, 0.64; 95%CI, 0.52-0.78,  $p<0.001$ ). The adjusted hazard ratios for hyper-polypharmacy were accentuated, compared to polypharmacy.

**CONCLUSION:** This study has identified that lower wealth, obesity, increasing age and chronic health conditions are significantly associated with polypharmacy and hyper-polypharmacy prevalence. The effect of these factors, on polypharmacy and especially hyper-polypharmacy prevalence, is likely to become more pronounced with the widening gap in UK wealth inequalities, the current obesity epidemic and the growing population of older people. The alcohol findings contribute to the debate on the relationship between alcohol consumption and health.

**Keywords:** polypharmacy, longitudinal, demography, older people

2

## STRENGTHS AND LIMITATIONS OF THIS STUDY

- This cross-sectional study uses medication data, from over 7000 older individuals, to identify factors which are associated with polypharmacy prevalence in primary care.
- In the analysis, a large number of covariates were used to minimise the impact of confounding factors.
- Participants were asked to self-report information about their prescribed medication usage. To verify their responses, participants were asked to show their medication containers to the interviewer.
- Smoking and alcohol consumption data was also collected by asking participants to self-report. This relies on accurate and truthful information recall to prevent bias.

## INTRODUCTION

Polypharmacy has been discussed extensively in the literature and media; however, there is no universally accepted definition for the practice of prescribing multiple medications to one individual. [1] At present, polypharmacy is commonly defined as “the use of five or more regular medications”, whilst hyper-polypharmacy, which is sometimes termed as “excessive polypharmacy”, is defined as “the use of ten or more regular medications”. [2] Although polypharmacy prevalence has increased over the past decade, there are relatively few data about the factors associated with polypharmacy and hyper-polypharmacy in primary care.[3]

Previous studies have shown that increasing age and the presence of chronic conditions are significantly associated with an increase in polypharmacy prevalence. [4-6] Comparatively fewer studies have examined whether socio-demographic or lifestyle factors, for example wealth and obesity, are associated with polypharmacy. In a study conducted by Haider et al, [7] no statistically significant association between polypharmacy and an individual’s socio-economic status was established. The findings from a study by Rajska-Neumann [8] revealed that there was no statistically significant difference in polypharmacy prevalence between smokers and non-smokers; whereas a statistically significant inverse relationship between alcohol consumption and the concomitant administration of medications was detected by Wong et al. [9] Finally, when Bueno et al [10] examined the association between polypharmacy and obesity, an adjusted odds ratio revealed that obese individuals (BMI  $>30\text{kg/m}^2$ ) were 1.6 times more likely to be experiencing polypharmacy, compared to individuals with a BMI less than  $30\text{kg/m}^2$ . To evaluate the relationship between the aforementioned factors and polypharmacy prevalence in primary care, a large sample study is required.

This study used data from The English Longitudinal Study of Ageing (ELSA) as this provided an opportunity to link polypharmacy and hyper-polypharmacy data to participants’ personal data. In particular, this study aimed to determine whether wealth, body mass index (BMI), smoking, alcohol consumption, age and the presence of chronic health conditions, are associated with polypharmacy (5-9 prescribed medications) and hyper-polypharmacy ( $\geq 10$  prescribed medications) prevalence in a community population of older people living in England.



## METHOD

### Sample and participants

A cross-sectional study was conducted using Wave 6 data from The English Longitudinal Study of Ageing (ELSA). Data collection took place between May 2012 and June 2013, from a representative sample of the English population who were aged 50 years or above.

Since ELSA began in 2002, participants have been asked to provide personal information about their household finances, health status, lifestyle choices and social interactions, on a bi-annual basis. In Wave 6, information from 10,601 participants was collected, which included 9,169 'core' participants. Members were considered 'core' if they were aged over 50 years old at the time of study enrollment and living at private residential addresses in England. [11] 8,054 nurse visits were completed at Wave 6, of whom 7,730 were carried out with core members. This latter group are the focus of the current study. [11]

### Patient Involvement and Ethics

Ethical approval for ELSA Wave 6 was granted from the National Research Ethics Committee under the National Research and Ethics Service (NRES). All participants were required to provide informed written consent. [12] All ELSA data is anonymous and freely accessible from the UK Data Service Discover. [13] Only data contained within the ELSA database was included in the analyses. No patients were involved in the development of the research question, study design or interpretation of the data in this study; therefore, ethical approval was not required for this study.

### Data Collection

#### Face-to-face interviews

The face-to-face interviews were conducted by trained interviewers, who asked participants to provide information about their current lifestyle choices, including smoking habits and alcohol consumption over the past twelve months. Smoking status was recorded as current smoker or non-smoker; whereas, the frequency of alcohol consumption over the past year was recorded as never, rarely, frequently or very frequently. [14] Rarely was defined as drinking alcohol less than twice a month. Frequently was defined as drinking alcohol between one and four times a week; whilst, very frequently was defined as drinking alcohol at least five times a week.

Participants were also asked to describe their current health status. Participants could select one of the following options: "excellent, very good, good, fair or poor". [15] These responses were converted into a two-level variable: good/fair and poor, with good/fair health status being the sum of responses ranging from "excellent" to "fair". In a subsequent question, participants were asked whether they had any chronic health conditions. Participants could answer this question with either yes or no. [15].

Finally, participants were asked to provide information about their household income, including information about their employment status, personal finances, assets, pensions and other benefits. Participant pension data was excluded when wealth index scores were calculated. Based upon their wealth index scores, participants were allocated to one of five wealth quintiles. Quintile 1 was the most affluent, whilst quintile 5 was the poorest.

## Questionnaire

After completion of the face-to-face interview, participants were asked to complete a paper-based questionnaire. The questionnaire was designed to obtain further information about the participants' living arrangements, health status, lifestyle choices and social interactions. [16]

## Nurse visit

The nurse visits took place in the participant's home. At the beginning of the visit, the nurse recorded information about participant demographics and their currently prescribed medications. Prescribed medication formulations were defined by the nurses as "pills, syrups, ointments, inhalers or injections". [17] If a participant reported taking one or more prescribed medications, the nurse sought their permission to record the name of their medication, in addition to seeing its container. The nurse determined current medication usage by asking the participant to confirm whether they had taken or used each reported medicine within the last seven days. [17] A maximum of 27 prescribed medications could be recorded for each participant. Medication information was coded by the nurse, according to the British National Formulary (Edition 61) chapter and subsection.

During the latter part of the visit, the nurse conducted a physical examination and recorded information about the participant's blood pressure, grip strength, height, weight and lung function. [17] Using a participant's height and weight data, it was possible to calculate their body mass index. A BMI  $<18.5\text{kg/m}^2$  was recorded as underweight, a BMI value between  $18.5-24.9\text{kg/m}^2$  was considered to be normal weight; whereas, a BMI of  $25.0-29.9\text{kg/m}^2$  was recorded as overweight and a BMI  $>30\text{kg/m}^2$  was recorded as obese.

## Inclusion Criteria

All participants must have completed a face-to-face interview, a paper-based questionnaire and received a nurse visit during ELSA wave 6 to meet the inclusion criteria for this study. [18]

## Defining polypharmacy and hyper-polypharmacy

Polypharmacy was defined as the concurrent use of five to nine currently prescribed medications, whilst hyper-polypharmacy was defined as the concurrent use of ten or more currently prescribed medications. These definitions have been used previously in other population based studies. [3,19]

## Data analysis

Initially, descriptive statistics were used to summarise the prevalence of polypharmacy and hyper-polypharmacy among participants. These data were subsequently stratified according to participant demographics. In the second part of the analysis, a bivariate model was used to assess the relationship between polypharmacy and the following independent variables: frequent alcohol consumption, increasing age, poor wealth, female sex, smoking, raised body mass index (BMI), poor self-rated health and the presence of a chronic health condition. Bivariate correlations between other covariates were also examined. Findings were presented as Pearson correlation coefficients ( $r$ ). The strength of each correlation was considered and described as either strong (1.00 – 0.50), moderate (0.49-0.30) or weak (0.29-0.10).[20]

In the final part of the analysis, two multivariate models were created to identify associations between participant characteristics and polypharmacy prevalence. Based upon previous work by Peduzzi et al [21], the minimum sample size required for the first multivariate model (polypharmacy) was 333; whilst the minimum sample size required for the second multivariate model (hyper-polypharmacy) was 1250. In both models, ill health was controlled for by using participants taking between one and four prescribed medications. This group of participants formed the control group. Participants taking no prescribed medications were excluded from this part of the analysis. In the first model, participants taking 5 to 9 medications were compared to the control group (1 to 4 prescribed medications). In the second model, participants taking 10 or more medications were compared to the control group (1 to 4 prescribed medications). Hazard ratios with corresponding 95% confidence intervals (CI), for polypharmacy and hyper-polypharmacy, were calculated after adjusting for covariates. The following factors were considered as covariates: gender, age, wealth, smoking, alcohol consumption, BMI, self-rated health and the presence of a chronic health condition. Missing data was coded as “missing” and presented as a separate category in the multivariate models. The data generated from the models was statistically significant if  $p < 0.05$ . All data analysis was undertaken using SPSS version 24.0.

## RESULTS

### Participant Characteristics:

A total of 7730 participants' data from ELSA Wave 6 were analysed. Participant characteristics are presented in Table 1. The mean age of participants in Wave 6 was 67.6 years, and 55.4% ( $n=4282/7730$ ) of the sample were female. Overall, 24.1% ( $n=1862/7730$ ) of the participants received polypharmacy and 6.4% ( $n=494/7730$ ) were receiving hyper-polypharmacy (Table 1). The proportion of individuals receiving polypharmacy and hyper-polypharmacy increased steadily with age. However, the prevalence of polypharmacy and hyper-polypharmacy in males and females was similar. (Table 1)

|                                     | No medications | 1-4 medications | 5-9 medications     | ≥10 medications           |
|-------------------------------------|----------------|-----------------|---------------------|---------------------------|
| <b>Participant Characteristics:</b> |                |                 | <b>Polypharmacy</b> | <b>Hyper-polypharmacy</b> |
| All participants ( $n=7730$ )       | 23.8%          | 45.7%           | 24.1%               | 6.4%                      |
| <b>Age:</b>                         |                |                 |                     |                           |
| 50-59 years ( $n=1695$ )            | 43.2%          | 42.4%           | 11.7%               | 2.7%                      |
| 60-69 years ( $n=3012$ )            | 26.6%          | 49.2%           | 19.6%               | 4.6%                      |
| 70-79 years ( $n=2114$ )            | 11.8%          | 45.9%           | 33.1%               | 9.2%                      |
| 80+ years ( $n=909$ )               | 6.4%           | 39.6%           | 41.3%               | 12.7%                     |
| <b>Gender:</b>                      |                |                 |                     |                           |
| Male ( $n=3448$ )                   | 24.9%          | 44.6%           | 24.4%               | 6.1%                      |
| Female ( $n=4282$ )                 | 22.9%          | 46.6%           | 23.9%               | 6.6%                      |
| <b>Chronic health condition:</b>    |                |                 |                     |                           |
| Yes ( $n=4289$ )                    | 9.6%           | 44.5%           | 35.2%               | 10.7%                     |
| No ( $n=3441$ )                     | 41.6%          | 47.1%           | 10.3%               | 1.0%                      |

**Table 1: Polypharmacy versus patient characteristics**

7

Overall, 35.2% (n= 1509/4289) of participants who reported having a chronic health condition were receiving polypharmacy; whereas, 10.7% (n=459/4289) were receiving hyper-polypharmacy. Only 10.3% (n=353/3441) and 1.0% (n=35/3441) of participants with no chronic health conditions, received polypharmacy and hyper-polypharmacy respectively (Table 1).

In a bivariate model, moderate positive correlations were detected between polypharmacy and the following variables: the presence of a chronic health condition, poor self-rated health and increasing age. A weak positive correlation between polypharmacy and a high BMI was established. Similarly, there was a weak positive correlation between lower wealth and polypharmacy. No correlations between gender and polypharmacy, and smoking and polypharmacy, were established. However, there was a weak negative correlation between polypharmacy and frequent alcohol consumption. All bivariate correlations are presented in Figure 1. Bivariate correlations between other covariates were also examined, and data is available in online supplementary table 1.

To determine whether other variables are associated with polypharmacy and hyper-polypharmacy, the results from the two multivariate models (Polypharmacy-1 and Hyper-polypharmacy-2) were analysed and presented in Table 2 and Table 3 respectively.

| Independent Variables                                                   | Adjusted HR | 95% CI |       | Sig.  |
|-------------------------------------------------------------------------|-------------|--------|-------|-------|
|                                                                         |             | Lower  | Upper |       |
| <b>Age</b>                                                              |             |        |       |       |
| 50-59 years ( <b>Reference</b> ) (n=963)                                | 1           |        |       |       |
| 60-69 years (n=2210)                                                    | 1.66        | 1.37   | 2.01  | <0.00 |
| 70-79 years (n=2344)                                                    | 3.42        | 2.81   | 4.77  | <0.00 |
| 80+ (n=371)                                                             | 4.52        | 3.58   | 5.70  | <0.00 |
| <b>Gender</b>                                                           |             |        |       |       |
| Male ( <b>Reference</b> ) (n=2588)                                      | 1           |        |       |       |
| Female (n=3300)                                                         | 0.92        | 0.81   | 1.04  | 0.21  |
| <b>Chronic health condition</b>                                         |             |        |       |       |
| No ( <b>Reference</b> ) (n=2008)                                        | 1           |        |       |       |
| Yes (n=3879)                                                            | 2.94        | 2.55   | 3.39  | 0.00  |
| Missing chronic health condition data (n=1)                             |             |        |       |       |
| <b>Self-rated health</b>                                                |             |        |       |       |
| Self-rated health: Good ( <b>Reference</b> ) (n=3907)                   | 1           |        |       |       |
| Self-rated health: Poor (n=1978)                                        | 2.98        | 2.61   | 3.4   | 0.00  |
| Missing self-rated health data (n=3)                                    |             |        |       |       |
| <b>Wealth</b>                                                           |             |        |       |       |
| Wealth: Quintile 1 (wealthiest) ( <b>Reference</b> ) (n=1237)           | 1           |        |       |       |
| Wealth: Quintile 2 (n=1244)                                             | 1.08        | 0.9    | 1.31  | 0.37  |
| Wealth: Quintile 3 (n=1196)                                             | 1.13        | 0.93   | 1.37  | 0.19  |
| Wealth: Quintile 4 (n=1190)                                             | 1.23        | 1.02   | 1.5   | 0.03  |
| Wealth: Quintile 5 (poorest) (n=921)                                    | 1.28        | 1.04   | 1.69  | 0.02  |
| Missing wealth data (n=100)                                             |             |        |       |       |
| <b>Body Mass Index (BMI)</b>                                            |             |        |       |       |
| BMI<18.5kg/m <sup>2</sup> : underweight (n=54)                          | 0.93        | 0.5    | 1.74  | 0.83  |
| BMI 18.5 -24.9 kg/m <sup>2</sup> : normal ( <b>Reference</b> ) (n=1313) | 1           |        |       |       |
| BMI 25.0-29.9kg/m <sup>2</sup> : overweight (n=2272)                    | 1.13        | 0.96   | 1.33  | 0.13  |

7

8

|                                                         |      |      |      |             |
|---------------------------------------------------------|------|------|------|-------------|
| BMI >30kg/m <sup>2</sup> : obese (n=1930)               | 1.81 | 1.53 | 2.15 | <b>0.00</b> |
| Missing BMI data (n=319)                                |      |      |      |             |
| <b>Current smoking habits since last ELSA interview</b> |      |      |      |             |
| Non-smoker ( <b>Reference</b> ) (n=3153)                | 1    |      |      |             |
| Smoker (n=650)                                          | 1.06 | 0.86 | 1.29 | 0.56        |
| Missing smoking data (n=2085)                           |      |      |      |             |
| <b>Alcohol consumption in past 12 months</b>            |      |      |      |             |
| Never ( <b>Reference</b> ) (n=792)                      | 1    |      |      |             |
| Rarely (n=930)                                          | 0.76 | 0.61 | 0.94 | <b>0.01</b> |
| Frequently (n=1797)                                     | 0.65 | 0.53 | 0.79 | <b>0.00</b> |
| Very frequently (n=1791)                                | 0.64 | 0.52 | 0.78 | <b>0.00</b> |
| Missing alcohol consumption data (n=578)                |      |      |      |             |

**Table 2: Model 1: Independent variables in polypharmacy (5-9 medications, n=2356) versus no polypharmacy (1-4 medications, n=3532)**

| Independent Variables                                                  | Adjusted HR | 95% CI |       | Sig.          |
|------------------------------------------------------------------------|-------------|--------|-------|---------------|
|                                                                        |             | Lower  | Upper |               |
| <b>Age</b>                                                             |             |        |       |               |
| 50-59 years ( <b>Reference</b> ) (n=765)                               | 1           |        |       |               |
| 60-69 years (n=1620)                                                   | 1.79        | 1.21   | 2.64  | < <b>0.00</b> |
| 70-79 years (n=1444)                                                   | 4.11        | 2.77   | 6.09  | < <b>0.00</b> |
| 80+ (n=197)                                                            | 5.94        | 3.79   | 9.29  | < <b>0.00</b> |
| <b>Gender</b>                                                          |             |        |       |               |
| Male ( <b>Reference</b> ) (n=1748)                                     | 1           |        |       |               |
| Female (n=2278)                                                        | 0.94        | 0.71   | 1.15  | 0.41          |
| <b>Chronic health condition</b>                                        |             |        |       |               |
| No ( <b>Reference</b> ) (n=1656)                                       | 1           |        |       |               |
| Yes (n=2370)                                                           | 5.30        | 3.63   | 7.73  | <b>0.00</b>   |
| <b>Self-rated health</b>                                               |             |        |       |               |
| Self-rated health: Good ( <b>Reference</b> ) (n=2944)                  | 1           |        |       |               |
| Self-rated health: Poor (n=1081)                                       | 6.69        | 5.21   | 8.58  | <b>0.00</b>   |
| Missing self-rated health data (n=1)                                   |             |        |       |               |
| <b>Wealth</b>                                                          |             |        |       |               |
| Wealth: Quintile 1 (wealthiest) ( <b>Reference</b> ) (n=907)           | 1           |        |       |               |
| Wealth: Quintile 2 (n=875)                                             | 1.41        | 0.93   | 2.13  | 0.11          |
| Wealth: Quintile 3 (n=797)                                             | 1.36        | 0.90   | 2.06  | 0.15          |
| Wealth: Quintile 4 (n=756)                                             | 1.75        | 1.17   | 2.60  | <b>0.006</b>  |
| Wealth: Quintile 5 (poorest) (n=611)                                   | 2.04        | 1.34   | 3.11  | <b>0.001</b>  |
| Missing wealth data (n=80)                                             |             |        |       |               |
| <b>Body Mass Index (BMI)</b>                                           |             |        |       |               |
| BMI <18.5kg/m <sup>2</sup> : underweight (n=38)                        | 0.88        | 0.26   | 2.95  | 0.83          |
| BMI 18.5 -24.9 kg/m <sup>2</sup> : normal ( <b>Reference</b> ) (n=959) | 1           |        |       |               |
| BMI 25.0-29.9kg/m <sup>2</sup> : overweight (n=1633)                   | 1.38        | 0.98   | 1.95  | 0.07          |
| BMI >30kg/m <sup>2</sup> : obese (n=1205)                              | 2.28        | 1.63   | 3.21  | <b>0.00</b>   |
| Missing BMI data (n=191)                                               |             |        |       |               |

8

|                                                         |      |      |      |              |
|---------------------------------------------------------|------|------|------|--------------|
| <b>Current smoking habits since last ELSA interview</b> |      |      |      |              |
| Non-smoker ( <b>Reference</b> ) (n=2077)                | 1    |      |      |              |
| Smoker (n=424)                                          | 0.98 | 0.68 | 1.39 | 0.89         |
| Missing smoking data (n=1525)                           |      |      |      |              |
| <b>Alcohol consumption in past 12 months</b>            |      |      |      |              |
| Never ( <b>Reference</b> ) (n=489)                      | 1    |      |      |              |
| Rarely (n=619)                                          | 0.70 | 0.50 | 0.99 | <b>0.046</b> |
| Frequently (n=1256)                                     | 0.40 | 0.29 | 0.56 | <b>0.00</b>  |
| Very frequently (n=1293)                                | 0.39 | 0.27 | 0.55 | <b>0.00</b>  |
| Missing alcohol consumption data (n=369)                |      |      |      |              |

**Table 3: Model 2: Independent variables in hyper-polypharmacy ( $\geq 10$  medications, n=494) versus no polypharmacy (1-4 medications, n=3532)**

### Examining the association between age and polypharmacy

In both models, increasing age was associated with polypharmacy and hyper-polypharmacy. For participants aged between 70 years and 79 years, the adjusted hazard ratio for polypharmacy was 3.42 (2.81 to 4.77,  $p < 0.001$ ) (Table 2). This value increased to 4.52 (3.58 to 5.70,  $p < 0.001$ ) in participants aged above 80 years old (Table 2). Similarly, the adjusted hazard ratios for hyper-polypharmacy increased from 4.11 (2.77 to 6.09,  $p < 0.001$ ) in participants aged between 70 years and 79 years to 5.94 (3.79 to 9.29,  $p < 0.001$ ) in participants aged above 80 years old (Table 3). All findings were statistically significant.

### Examining the association between the presence of a chronic health condition and polypharmacy

The adjusted hazard ratio for polypharmacy and the presence of a chronic health condition was 2.94 (2.55 to 3.39,  $p < 0.001$ ) (Table 2); whereas, the adjusted hazard ratio for hyper-polypharmacy and the presence of a chronic health condition was 5.30 (3.63 to 7.73,  $p < 0.001$ ) (Table 3). In both models, statistically significant results were generated.

### Examining the association between wealth and polypharmacy

The adjusted hazard ratio for polypharmacy increased from 1.08 (0.9 to 1.31,  $p = 0.37$ ) in wealth quintile 2 to 1.28 (1.04 to 1.69,  $p = 0.02$ ) in wealth quintile 5 (Table 2). Similarly, the adjusted hazard ratio for hyper-polypharmacy increased from 1.41 (0.93 to 2.13,  $p = 0.11$ ) in wealth quintile 2 to 2.04 (1.34 to 3.11,  $p = 0.001$ ) in wealth quintile 5 (Table 3). In both models, statistically significant differences in adjusted hazard ratios for polypharmacy and hyper-polypharmacy were detected in the lower wealth quintiles (quintile 4 and 5).

### Examining the association between BMI and polypharmacy

In underweight participants, the adjusted hazard ratio for polypharmacy was 0.93 (0.5 to 1.74,  $p = 0.83$ ) (Table 2); whereas, the adjusted hazard ratios for polypharmacy in participants who were overweight or obese were 1.13 (0.96 to 1.33,  $p = 0.13$ ) and 1.81 (1.53 to 2.15,  $p < 0.001$ ) respectively (Table 2). Adjusted hazard ratios for hyper-polypharmacy produced similar results. In underweight participants, the adjusted hazard ratio for hyper-polypharmacy decreased to 0.88 (0.26 to 2.95,  $p = 0.83$ ) (Table 3); whereas, the adjusted hazard ratio for hyper-polypharmacy in overweight participants was 1.38 (0.98 to 1.95,  $p = 0.07$ ) increasing

1  
2  
3 substantially to 2.28 (1.63 to 3.21,  $p<0.001$ ) in obese participants (Table 3). Only the adjusted  
4 hazard ratios for polypharmacy and hyper-polypharmacy, in relation to obesity, produced  
5 statistically significant results.  
6

### 7 **Examining the association between smoking and polypharmacy**

8  
9 The adjusted hazard ratio for polypharmacy and smoking was 1.06 (0.86 to 1.29,  $p=0.56$ )  
10 (Table 2) whereas the adjusted hazard ratio for hyper-polypharmacy and smoking was 0.98  
11 (0.68 to 1.39,  $p=0.89$ ) (Table 3). Both models failed to produce any statistically significant  
12 results.  
13

### 14 **Examining the association between alcohol consumption and polypharmacy**

15  
16 Adjusted hazard ratios for polypharmacy and hyper-polypharmacy were calculated using the  
17 participant's alcohol consumption data provided during the face-to-face interview. When  
18 compared to individuals who reported never drinking alcohol, the adjusted hazard ratio for  
19 participants who reported rarely consuming alcohol was 0.76 (0.61 to 0.94,  $p=0.01$ ) (Table  
20 2). This value decreased further to 0.64 (0.52 to 0.78,  $p<0.001$ ) in participants who reported  
21 drinking alcohol very frequently (Table 2). The adjusted hazard ratios for hyper-  
22 polypharmacy produced similar results. For participants who reported rarely consuming  
23 alcohol, the adjusted hazard ratio for hyper-polypharmacy was 0.70 (0.50 to 0.99,  $p=0.046$ ),  
24 when compared to individuals who reported never drinking alcohol (Table 3); whereas the  
25 adjusted hazard ratio for hyper-polypharmacy in participants who reported drinking alcohol  
26 frequently was 0.39 (0.27 to 0.55,  $p<0.001$ ) (Table 3). All adjusted hazard ratios for  
27 polypharmacy and hyper-polypharmacy, in relation to self-reported alcohol consumption,  
28 were statistically significant.  
29  
30

## 31 **DISCUSSION**

32  
33 This study confirms that increasing age and the presence of chronic health conditions are  
34 associated with polypharmacy prevalence, but also that obesity and lower wealth are  
35 significantly associated with polypharmacy. Frequent alcohol consumption is inversely  
36 associated with polypharmacy prevalence. Results from previous studies, which have  
37 investigated the influence of ageing and chronic health conditions on polypharmacy  
38 prevalence, complement our findings. [19,22,23].  
39  
40

41 In the existing literature, few studies have investigated whether polypharmacy prevalence is  
42 associated with wealth or BMI. [24,25] One study conducted in Rome, analysed a national  
43 prescription database and a multivariate model was used to identify participant characteristics  
44 which influenced polypharmacy prevalence. [24] The authors concluded that individuals  
45 living in lower socio-economic areas are 33% more likely to experience polypharmacy  
46 compared to individuals living in higher socio-economic areas. In our study, participants  
47 were allocated to one of five wealth quintiles, based upon their wealth index scores.  
48 Participants living in the lowest wealth quintiles were 28% more likely to experience  
49 polypharmacy and twice as likely to experience hyper-polypharmacy, when compared to  
50 participants living in the highest wealth quintile. Our findings show that lower wealth is  
51 significantly associated with an increase in polypharmacy and hyper-polypharmacy  
52 prevalence. This finding is important because the latest figures published by the Office of  
53 National Statistics [25] show that wealth inequalities across the United Kingdom (UK) have  
54 begun to rise again, after a decade-long decline. There is also evidence to suggest that the  
55  
56  
57  
58

1  
2  
3 incidence of chronic health conditions and multi-morbidities is highest among individuals  
4 residing in deprived areas. [26,27] The aforementioned individuals are likely to require  
5 multiple medications to manage or treat their chronic conditions and thus, providing support  
6 for the association between lower wealth and polypharmacy.  
7

8 Our multivariate model also revealed that obesity (body mass index  $>30\text{kg/m}^2$ ) was another  
9 factor associated with polypharmacy and hyper-polypharmacy prevalence. This finding was  
10 statistically significant. The same association was identified during another study; however,  
11 the authors did not comment on the statistical significance of their results, nor did they  
12 conduct any further research into the association. [28] Identifying the association between  
13 polypharmacy and obesity is also important because obesity has become a major public  
14 health concern in England. Assuming the current obesity epidemic continues as predicted, the  
15 prevalence of polypharmacy and hyper-polypharmacy among older people in England, is  
16 likely to follow suit. [29]  
17  
18

19 This study found no statistically significant association between smoking and polypharmacy.  
20 Similarly, there were no statistically significant association between smoking and hyper-  
21 polypharmacy. Our findings are supported by Rajska-Neumann [8] and Henderson et al [30].  
22 However, another study reports that smoking is inversely associated with polypharmacy  
23 (adjusted OR 0.42;95%CI,0.33-0.53). [31]  
24  
25

26 Frequent alcohol consumption in the past year was inversely associated with polypharmacy  
27 and hyper-polypharmacy prevalence. This finding is consistent with previous work, involving  
28 ELSA, which reported that self-reported alcohol consumption (even at high levels) was not  
29 related to poor self-rated health. [32,33] The alcohol findings in this current study could be  
30 explained by the sick quitter hypothesis, where individuals stop or reduce their alcohol  
31 consumption due to illness. [34] However, Rimm and Moats [35] conclude that the sick  
32 quitter hypothesis has been refuted by a wide range of evidence. The inverse association  
33 between alcohol consumption and polypharmacy was also detected by Incalzi et al [31]  
34 although they appear to discount a genuine association and rather attribute this to bias (i.e.  
35 patients in better health are less motivated to correct unhealthy habits).  
36  
37

38 Finally, most of the existing literature suggests that females take more medications compared  
39 to males; however, our study found that there was no statistically significant difference in  
40 polypharmacy and hyper-polypharmacy prevalence between males and females. [36,37,38]  
41 Pan et al [39] provides support for our findings and concluded that female sex is not  
42 significantly associated with an increased polypharmacy prevalence.  
43

44 To our knowledge this is the first study which has used medication data, from a large  
45 representative sample of older adults, to determine whether lower wealth, obesity, smoking,  
46 alcohol consumption, in addition to increasing age and the presence of chronic health  
47 conditions, are associated with polypharmacy and hyper-polypharmacy prevalence in primary  
48 care. All analysed data was obtained using standardised data collection methods and  
49 validated data collection tools. Also, this study used a large number of covariates, which  
50 reduced the impact of confounders and minimised study bias.  
51  
52

53 This study has several limitations. Actual medication use among participants may have been  
54 higher than recorded medication use for several reasons. Firstly, participants were asked  
55 about their prescribed medications; however, medications purchased without prescription, for  
56  
57



1  
2  
3 example weak analgesics or antihistamines, were not recorded. Secondly, prescribed  
4 medications were coded according to BNF chapter and subsection. It was assumed that each  
5 code presented a single active ingredient; however, several combination drugs, for example  
6 co-amilofruse and co-amilozide, were also represented by a single code. Furthermore, when  
7 the nurse enquired about prescribed medications, they asked the following question: “Are you  
8 taking or using any medications, pills, syrups, ointments, puffers or injections prescribed to  
9 you by a doctor or a nurse?” [19] This question refers to some medicinal formulations, but  
10 the list is not exhaustive. Thus, a participant using eye drops or wearing a transdermal patch  
11 may not have reported this medication as the formulation was not explicitly stated in the  
12 question. Consequently, polypharmacy and hyper-polypharmacy prevalence may have been  
13 underestimated in this study.  
14  
15

16 To obtain data about prescribed medications and several other covariates, including smoking  
17 habits and alcohol consumption, participants were asked to self-report. This method of data  
18 collection relies on all participants accurately and truthfully recalling information to prevent  
19 bias. [40] The risk of recall bias associated with prescribed medication information was  
20 minimised by the nurse, because participants were asked to show their medication containers  
21 to verify their responses. However, it was not possible to minimise the risk of recall bias  
22 associated with the other covariates. Finally, it is not possible to determine the direction of  
23 causality from our data, due to the cross-sectional nature of the study.  
24  
25

## 26 CONCLUSION

27  
28 This study has identified that lower wealth, obesity, increasing age and the presence of  
29 chronic health conditions are all associated with polypharmacy and hyper-polypharmacy  
30 prevalence, among older people in primary care. An inverse relationship between frequent  
31 alcohol consumption and polypharmacy prevalence was also established. In the future, the  
32 effect of obesity and lower wealth on polypharmacy and hyper-polypharmacy prevalence is  
33 likely to become more pronounced, as the gap in UK wealth inequalities begins to widen  
34 again and the UK obesity epidemic continues. Future exploratory work is required to  
35 determine the causation behind these associations.  
36  
37  
38

---

## 39 WHAT IS ALREADY KNOWN ABOUT THIS TOPIC

- 40 • The prevalence of polypharmacy and hyper-polypharmacy is increasing globally
- 41
- 42 • Increasing age and the presence of chronic health conditions are associated with an
- 43 increase in polypharmacy prevalence.
- 44
- 45 • Few studies have examined whether socio-demographic or lifestyle factors, for
- 46 example wealth and obesity, are associated with polypharmacy.
- 47
- 48
- 49

## 50 WHAT THIS STUDY ADDS

- 51 • Obesity and lower wealth have been identified as factors which are significantly
- 52 associated with polypharmacy and especially hyper-polypharmacy. As the gap in UK
- 53 wealth inequalities widens and the UK obesity epidemic continues, the effect these
- 54 factors on polypharmacy prevalence is likely to become more pronounced.
- 55
- 56
- 57

- Frequent alcohol consumption is inversely associated with polypharmacy and hyperpolypharmacy prevalence.

---

## ACKNOWLEDGEMENTS

The authors would like to thank the ELSA participants, the ELSA researchers and the UK Data Service for enabling the use of ELSA data for this analysis.

## CONTRIBUTORSHIP STATEMENT

All authors contributed to the study idea. MF led the study and conducted all data analysis. All authors had full access to ELSA Wave 6 data, supplied by the UK Data Service and they take full responsibility for the integrity and accurate analysis of data. All authors contributed to data interpretation. NS drafted the manuscript with contributions from MF, RV and SW. NS and MF are the Guarantors for this study.

## TRANSPARENCY STATEMENT

NS and MF confirm that the manuscript is an honest, accurate and transparent account of the study being reported. No important aspects of this study have been omitted.

**COMPETING INTERESTS** All authors have completed the ICMJE form for disclosure of potential conflicts of interest available from [www.icmje.org/coi\\_disclosure.pdf](http://www.icmje.org/coi_disclosure.pdf) and declare that there is nothing to disclose.

**FUNDING** This study received no specific funding

**DATA SHARING STATEMENT** No additional data is available; however, anonymous ELSA data is publicly available from <https://discover.ukdataservice.ac.uk/> [36]

**COPYRIGHT/LICENSE FOR PUBLICATION:** The Corresponding Author has the right to grant on behalf of all authors and does grant on behalf of all authors, *a worldwide license* to the Publishers and its licensees in perpetuity, in all forms, formats and media (whether known now or created in the future), to i) publish, reproduce, distribute, display and store the Contribution, ii) translate the Contribution into other languages, create adaptations, reprints, include within collections and create summaries, extracts and/or, abstracts of the Contribution, iii) create any other derivative work(s) based on the Contribution, iv) to exploit all subsidiary rights in the Contribution, v) the inclusion of electronic links from the Contribution to third party material where-ever it may be located; and, vi) license any third party to do any or all of the above.

## REFERENCES

1. Duerden M, Payne R. Polypharmacy – what is it and how common is it? Prescriber. 2014 Nov
2. O'Dwyer M, Peklar J, McCallion P, McCarron M, Henman MC. Factors associated with polypharmacy and excessive polypharmacy in older people with intellectual disability differ from the general population: a cross-sectional observational nationwide study. BMJ open. 2016 Apr 1;6(4):e010505.
3. Guthrie B, Makubate B, Hernandez-Santiago V, Dreischulte T. The rising tide of polypharmacy and drug-drug interactions: population database analysis 1995–2010. BMC Med 2015;13:74
4. The Dynamics of Ageing. Evidence from the English Longitudinal Study of Ageing (Wave 7) 2002-2015. Available from [www.ifs.org.uk/uploads/elsa/docs\\_w7/report.pdf](http://www.ifs.org.uk/uploads/elsa/docs_w7/report.pdf) [Accessed 27/07/2017]

- 1
  - 2
  - 3
  - 4
  - 5
  - 6
  - 7
  - 8
  - 9
  - 10
  - 11
  - 12
  - 13
  - 14
  - 15
  - 16
  - 17
  - 18
  - 19
  - 20
  - 21
  - 22
  - 23
  - 24
  - 25
  - 26
  - 27
  - 28
  - 29
  - 30
  - 31
  - 32
  - 33
  - 34
  - 35
  - 36
  - 37
  - 38
  - 39
  - 40
  - 41
  - 42
  - 43
  - 44
  - 45
  - 46
  - 47
  - 48
  - 49
  - 50
  - 51
  - 52
  - 53
  - 54
  - 55
  - 56
  - 57
  - 58
  - 59
  - 60
5. Department of Health. Long Term Condition Compendium of Information. Third Edition. 2012 [www.gov.uk/government/uploads/attachment\\_data/file/216528/dh\\_134486.pdf](http://www.gov.uk/government/uploads/attachment_data/file/216528/dh_134486.pdf) [Accessed 27/07/2017]
  6. Silveira EA, Dalastra L, Pagotto V. Polypharmacy, chronic diseases and nutritional markers in community-dwelling older. *Revista Brasileira de Epidemiologia*. 2014 Dec;17(4):818-29.
  7. Haider SI, Johnell K, Thorslund M, Fastbom J. Analysis of the association between polypharmacy and socioeconomic position among elderly aged  $\geq 77$  years in Sweden. *Clinical therapeutics*. 2008 Feb 1;30(2):419-27.
  8. Rajska-Neumann A, Szymański M, Balcer N, Grześkowiak E, Szalek E, Wieczorowska-Tobis K. Is smoking a determinant of polypharmacy among elderly subject?. *Przegląd lekarski*. 2004 Dec;62(10):1145-7.
  9. Wong H, Heuberger R, Logomarsino J, Hewlings S. Associations between alcohol use, polypharmacy and falls in older adults: Helen Wong and colleagues report on a cross-sectional study into alcohol consumption, medication use and falls in the community. *Nursing older people*. 2016 Jan 28;28(1):30-6.
  10. Bueno DR, Monteiro HL, Rosa CS, Codogno JS, Fernandes RA, Marucci MF. Association between physical activity levels and polypharmacy in hypertensive patients. *Medicina (Ribeirão Preto)*. 2016;49(3):240-7.
  11. Wade KF, Marshall A, Vanhoutte B, Wu FC, O'Neill TW, Lee DM. Does pain predict frailty in older men and women? Findings from the English Longitudinal Study of Ageing (ELSA). *The Journals of Gerontology: Series A*. 2017 Mar 1;72(3):403-9.
  12. English Longitudinal Study of Ageing (ELSA) Wave 1 to Wave 6. Available from [http://doc.ukdataservice.ac.uk/doc/5050/mrdoc/pdf/5050\\_elsa\\_user\\_guide\\_waves\\_1-6\\_v3.pdf](http://doc.ukdataservice.ac.uk/doc/5050/mrdoc/pdf/5050_elsa_user_guide_waves_1-6_v3.pdf) Accessed 8/12/2017
  13. UK Data Service Discover. English Longitudinal Study of Ageing. Available from <https://discover.ukdataservice.ac.uk/series/?sn=200011> Accessed 8/12/2017
  14. Lee DM, Nazroo J, O'Connor DB, Blake M, Pendleton N. Sexual health and well-being among older men and women in England: findings from the English Longitudinal Study of Ageing. *Archives of sexual behavior*. 2016 Jan 1;45(1):133-44.
  15. Nat Cen Social Research. English Longitudinal Study of Ageing Wave 6 interview questionnaire. Version 3.0 Available from [https://www.elsa-project.ac.uk/uploads/elsa/docs\\_w6/main\\_questionnaire.pdf](https://www.elsa-project.ac.uk/uploads/elsa/docs_w6/main_questionnaire.pdf) [Accessed 5/9/2017]
  16. English Longitudinal Study of Ageing Health and Lifestyles of People aged 50 or over. Self-completion questionnaire. Available from [https://www.elsa-project.ac.uk/uploads/elsa/docs\\_w6/self\\_completion\\_main.pdf](https://www.elsa-project.ac.uk/uploads/elsa/docs_w6/self_completion_main.pdf) [Accessed 5/9/2017]
  17. Nat Cen Social Research. English Longitudinal Study of Ageing Wave 6 Nurse questionnaire. 2012-2013. Available from [https://www.elsa-project.ac.uk/uploads/elsa/docs\\_w6/nurse\\_documentation.pdf](https://www.elsa-project.ac.uk/uploads/elsa/docs_w6/nurse_documentation.pdf) [Accessed 5/9/2017]
  18. Steptoe A, Breeze E, Banks J, Nazroo J. Cohort profile: the English longitudinal study of ageing. *International journal of epidemiology*. 2012 Nov 6;42(6):1640-8.
  19. Bjerrum L, Søgaard J, Hallas J, Kragstrup J. Polypharmacy: correlations with sex, age and drug regimen A prescription database study. *European journal of clinical pharmacology*. 1998 Jun 1;54(3):197-202
  20. Statistical correlation. The relationship between two variables. Available from <https://explorable.com/statistical-correlation> Accessed 8/12/2017
  21. Peduzzi P, Concato J, Kemper E, Holford TR, Feinstein AR. A simulation study of the number of events per variable in logistic regression analysis. *Journal of clinical epidemiology*. 1996 Dec 1;49(12):1373-9.
  22. The Irish Longitudinal Study of Ageing. Main Questionnaire 2010. Available from <http://www.ucd.ie/issda/static/documentation/tilda/tilda-capi-qaire-wave1.pdf> [Accessed 5/9/2017]
  23. Tjia J, Velten SJ, Parsons C, Valluri S, Briesacher BA. Studies to reduce unnecessary medication use in frail older adults: a systematic review. *Drugs & aging*. 2013 May 1;30(5):285-307.
  24. Fano V, Chini F, Pezzotti P, Bontempi K. Estimating the Prevalence and the Determinants of Polypharmacy Using Data from a Health Administrative Database: A Comparison of Results Obtained Employing Different Algorithms. *Advances in Pharmacoeconomics & Drug Safety*. 2014;3(151):2167-1052.
  25. The Office of National Statistics Report: Chapter 2 Total Wealth, Wealth in GB, 2012-2014. Available from <http://webarchive.nationalarchives.gov.uk/20160105170657/http://www.ons.gov.uk/ons/rel/was/wealth-in-great-britain-wave-4/2012-2014/rpt-chapter-2.html>

- 1
  - 2
  - 3
  - 4
  - 5
  - 6
  - 7
  - 8
  - 9
  - 10
  - 11
  - 12
  - 13
  - 14
  - 15
  - 16
  - 17
  - 18
  - 19
  - 20
  - 21
  - 22
  - 23
  - 24
  - 25
  - 26
  - 27
  - 28
  - 29
  - 30
  - 31
  - 32
  - 33
  - 34
  - 35
  - 36
  - 37
  - 38
  - 39
  - 40
  - 41
  - 42
  - 43
  - 44
  - 45
  - 46
  - 47
  - 48
  - 49
  - 50
  - 51
  - 52
  - 53
  - 54
  - 55
  - 56
  - 57
  - 58
  - 59
  - 60
26. Kings Fund. Long term conditions. Available from <https://www.kingsfund.org.uk/projects/time-think-differently/trends-disease-and-disability-long-term-conditions-multi-morbidity>
27. Barnett K, Mercer SW, Norbury M, Watt G, Wyke S, Guthrie B. Epidemiology of multimorbidity and implications for health care, research, and medical education: a cross-sectional study. *The Lancet*. 2012 Jul 13;380(9836):37-43.
28. Team CP. The impact of obesity on drug prescribing in primary care. *The British Journal of General Practice*. 2005 Oct 1;55(519):743.
29. Wang YC, McPherson K, Marsh T, Gortmaker SL, Brown M. Health and economic burden of the projected obesity trends in the USA and the UK. *The Lancet*. 2011 Sep 2;378(9793):815-25.
30. Henderson JA, Buchwald D, Manson SM. Relationship of medication use to health-related quality of life among a group of older American Indians. *Journal of applied gerontology*. 2006 Feb;25(1\_suppl):89S-104S.
31. Incalzi RA, Corsonello A, Pedone C, Corica F, Carbonin P. Depression and drug utilization in an elderly population. *Therapeutics and clinical risk management*. 2005 Mar;1(1):55.
32. Frisher M, Mendonça M, Shelton N, Pikhart H, de Oliveira C, Holdsworth C. Is alcohol consumption in older adults associated with poor self-rated health? Cross-sectional and longitudinal analyses from the English Longitudinal Study of Ageing. *BMC public health*. 2015 Jul 24;15(1):703.
33. Holdsworth C, Mendonca M, Pikhart H, Frisher M, de Oliveira C, Shelton N. Is regular drinking in later life an indicator of good health? Evidence from the English Longitudinal Study of Ageing. *J Epidemiol Community Health* 2016 Aug 1;70(8):764-70
34. Shaper AG, Wannamethee G, Walker M. Alcohol and mortality in British men: Explaining the U-shaped curve. *Lancet*. 1988; 2:1267-1273.
35. Rimm EB, Moats C. Alcohol and coronary heart disease: drinking patterns and mediators of effect. *Annals of Epidemiology*. 2007. May 31; 17(5): S3-7
36. Kaufman DW, Kelly JP, Rosenberg L, Anderson TE, Mitchell AA. Recent patterns of medication use in the ambulatory adult population of the United States: the Slone survey. *Jama*. 2002 Jan 16;287(3):337-44.
37. Schuler J, Dückelmann C, Beindl W, Prinz E, Michalski T, Pichler M. Polypharmacy and inappropriate prescribing in elderly internal-medicine patients in Austria. *Wiener klinische Wochenschrift*. 2008 Dec 1;120(23):733-41.
38. Wauters M, Elseviers M, Vaes B, Degryse J, Dalleur O, Vander Stichele R, Van Bortel L, Azermai M. Polypharmacy in a Belgian cohort of community-dwelling oldest old (80+). *Acta Clinica Belgica*. 2016 May 3;71(3):158-66.
39. Pan HH, Li CY, Chen TJ, Su TP, Wang KY. Association of polypharmacy with fall-related fractures in older Taiwanese people: age-and gender-specific analyses. *BMJ open*. 2014 Mar 1;4(3): e004428.
40. Barker, C., Pistrang, N. and Elliott, R. (2002) *Self-Report Methods*, in *Research Methods in Clinical Psychology: An Introduction for Students and Practitioners*, Second Edition, John Wiley & Sons, Ltd, Chichester, UK. doi: 10.1002/0470013435.ch6

## FIGURE LEGENDS:

Figure 1: Bivariate correlations between polypharmacy and covariates

1  
2  
3  
4  
5  
6  
7  
8  
9  
10  
11  
12  
13  
14  
15  
16  
17  
18  
19  
20  
21  
22  
23  
24  
25  
26  
27  
28  
29  
30  
31  
32  
33  
34  
35  
36  
37  
38  
39  
40  
41  
42  
43  
44  
45  
46  
47  
48  
49  
50  
51  
52  
53  
54  
55  
56  
57  
58  
59  
60

For peer review only

1  
2  
3  
4  
5  
6  
7  
8  
9  
10  
11  
12  
13  
14  
15  
16  
17  
18  
19  
20  
21  
22  
23  
24  
25  
26  
27  
28  
29  
30  
31  
32  
33  
34  
35  
36  
37  
38  
39  
40  
41  
42  
43  
44  
45  
46  
47  
48  
49  
50  
51  
52  
53  
54  
55  
56  
57  
58  
59  
60

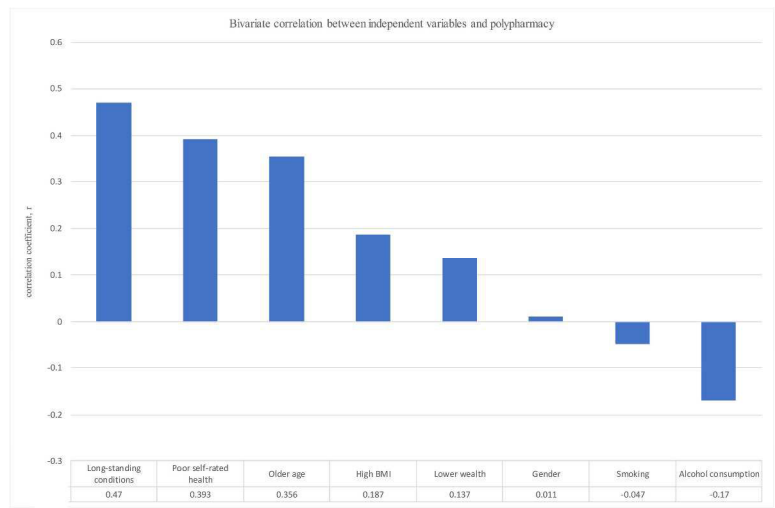

Figure 1: Bivariate correlations between polypharmacy and covariates

338x190mm (300 x 300 DPI)

Review only

**ONLINE SUPPLEMENTARY TABLE 1:**

|                                        | Frequent alcohol intake | Increased age | Low wealth | Smoking | Obesity | Poor self-rated health | Presence of a chronic health condition | Gender (female) | Polypharmacy |
|----------------------------------------|-------------------------|---------------|------------|---------|---------|------------------------|----------------------------------------|-----------------|--------------|
| Frequent alcohol intake                | 1                       | -0.106        | -0.251     | -0.108  | -0.094  | -0.220                 | -0.137                                 | -0.204          | -0.188       |
| Increased age                          | -0.106                  | 1             | -0.049     | -0.195  | -0.033  | 0.118                  | 0.141                                  | 0.010           | 0.353        |
| Low wealth                             | -0.251                  | -0.049        | 1          | 0.205   | 0.135   | 0.218                  | 0.107                                  | 0.059           | 0.149        |
| Smoking                                | -0.108                  | -0.195        | 0.205      | 1       | -0.117  | 0.107                  | 0.000                                  | 0.044           | -0.040       |
| Obesity                                | -0.094                  | -0.033        | 0.135      | -0.117  | 1       | 0.142                  | 0.115                                  | -0.030          | 0.187        |
| Poor self-rated health                 | -0.220                  | 0.118         | 0.218      | 0.107   | 0.142   | 1                      | 0.407                                  | -0.010          | 0.421        |
| Presence of a chronic health condition | -0.137                  | 0.141         | 0.107      | 0.000   | 0.115   | 0.407                  | 1                                      | 0.006           | 0.473        |
| Gender (female)                        | -0.204                  | 0.010         | 0.059      | 0.044   | -0.030  | -0.010                 | 0.006                                  | 1               | 0.011        |
| Poly-pharmacy                          | -0.188                  | 0.353         | 0.149      | -0.040  | 0.187   | 0.421                  | 0.473                                  | 0.011           | 1            |

Bivariate correlations between covariates

STROBE 2007 (v4) Statement—Checklist of items that should be included in reports of cross-sectional studies

| Section/Topic             | Item # | Recommendation                                                                                                                                                                       | Reported on page # |
|---------------------------|--------|--------------------------------------------------------------------------------------------------------------------------------------------------------------------------------------|--------------------|
| Title and abstract        | 1      | (a) Indicate the study’s design with a commonly used term in the title or the abstract                                                                                               | 1                  |
|                           |        | (b) Provide in the abstract an informative and balanced summary of what was done and what was found                                                                                  | 2                  |
| <b>Introduction</b>       |        |                                                                                                                                                                                      |                    |
| Background/rationale      | 2      | Explain the scientific background and rationale for the investigation being reported                                                                                                 | 3                  |
| Objectives                | 3      | State specific objectives, including any prespecified hypotheses                                                                                                                     | 3                  |
| <b>Methods</b>            |        |                                                                                                                                                                                      |                    |
| Study design              | 4      | Present key elements of study design early in the paper                                                                                                                              | 4-5                |
| Setting                   | 5      | Describe the setting, locations, and relevant dates, including periods of recruitment, exposure, follow-up, and data collection                                                      | 4                  |
| Participants              | 6      | (a) Give the eligibility criteria, and the sources and methods of selection of participants                                                                                          | 4-5                |
| Variables                 | 7      | Clearly define all outcomes, exposures, predictors, potential confounders, and effect modifiers. Give diagnostic criteria, if applicable                                             | 5-6                |
| Data sources/ measurement | 8*     | For each variable of interest, give sources of data and details of methods of assessment (measurement). Describe comparability of assessment methods if there is more than one group | 4-5                |
| Bias                      | 9      | Describe any efforts to address potential sources of bias                                                                                                                            | 12                 |
| Study size                | 10     | Explain how the study size was arrived at                                                                                                                                            | 4                  |
| Quantitative variables    | 11     | Explain how quantitative variables were handled in the analyses. If applicable, describe which groupings were chosen and why                                                         | 4-6                |
| Statistical methods       | 12     | (a) Describe all statistical methods, including those used to control for confounding                                                                                                | 5-6                |
|                           |        | (b) Describe any methods used to examine subgroups and interactions                                                                                                                  | 5-6                |
|                           |        | (c) Explain how missing data were addressed                                                                                                                                          | 6                  |
|                           |        | (d) If applicable, describe analytical methods taking account of sampling strategy                                                                                                   |                    |
|                           |        | (e) Describe any sensitivity analyses                                                                                                                                                |                    |
| <b>Results</b>            |        |                                                                                                                                                                                      |                    |



|                          |     |                                                                                                                                                                                                                                                                                                                                                                                                               |            |
|--------------------------|-----|---------------------------------------------------------------------------------------------------------------------------------------------------------------------------------------------------------------------------------------------------------------------------------------------------------------------------------------------------------------------------------------------------------------|------------|
| Participants             | 13* | (a) Report numbers of individuals at each stage of study—eg numbers potentially eligible, examined for eligibility, confirmed eligible, included in the study, completing follow-up, and analysed<br>(b) Give reasons for non-participation at each stage<br>(c) Consider use of a flow diagram                                                                                                               | 6-9        |
| Descriptive data         | 14* | (a) Give characteristics of study participants (eg demographic, clinical, social) and information on exposures and potential confounders<br>(b) Indicate number of participants with missing data for each variable of interest                                                                                                                                                                               | 6<br>7-9   |
| Outcome data             | 15* | Report numbers of outcome events or summary measures                                                                                                                                                                                                                                                                                                                                                          | 7-9        |
| Main results             | 16  | (a) Give unadjusted estimates and, if applicable, confounder-adjusted estimates and their precision (eg, 95% confidence interval). Make clear which confounders were adjusted for and why they were included<br>(b) Report category boundaries when continuous variables were categorized<br>(c) If relevant, consider translating estimates of relative risk into absolute risk for a meaningful time period | 8-9<br>8-9 |
| Other analyses           | 17  | Report other analyses done—eg analyses of subgroups and interactions, and sensitivity analyses                                                                                                                                                                                                                                                                                                                |            |
| <b>Discussion</b>        |     |                                                                                                                                                                                                                                                                                                                                                                                                               |            |
| Key results              | 18  | Summarise key results with reference to study objectives                                                                                                                                                                                                                                                                                                                                                      | 10-12      |
| Limitations              | 19  | Discuss limitations of the study, taking into account sources of potential bias or imprecision. Discuss both direction and magnitude of any potential bias                                                                                                                                                                                                                                                    | 12         |
| Interpretation           | 20  | Give a cautious overall interpretation of results considering objectives, limitations, multiplicity of analyses, results from similar studies, and other relevant evidence                                                                                                                                                                                                                                    | 12-13      |
| Generalisability         | 21  | Discuss the generalisability (external validity) of the study results                                                                                                                                                                                                                                                                                                                                         | 13         |
| <b>Other information</b> |     |                                                                                                                                                                                                                                                                                                                                                                                                               |            |
| Funding                  | 22  | Give the source of funding and the role of the funders for the present study and, if applicable, for the original study on which the present article is based                                                                                                                                                                                                                                                 | N/A        |

\*Give information separately for cases and controls in case-control studies and, if applicable, for exposed and unexposed groups in cohort and cross-sectional studies.

**Note:** An Explanation and Elaboration article discusses each checklist item and gives methodological background and published examples of transparent reporting. The STROBE checklist is best used in conjunction with this article (freely available on the Web sites of PLoS Medicine at <http://www.plosmedicine.org/>, Annals of Internal Medicine at <http://www.annals.org/>, and Epidemiology at <http://www.epidem.com/>). Information on the STROBE Initiative is available at [www.strobe-statement.org](http://www.strobe-statement.org).

# BMJ Open

## Factors associated with polypharmacy in primary care: A cross-sectional analysis of data from The English Longitudinal Study of Ageing (ELSA)

|                                 |                                                                                                                                                                                                                                                            |
|---------------------------------|------------------------------------------------------------------------------------------------------------------------------------------------------------------------------------------------------------------------------------------------------------|
| Journal:                        | <i>BMJ Open</i>                                                                                                                                                                                                                                            |
| Manuscript ID                   | bmjopen-2017-020270.R2                                                                                                                                                                                                                                     |
| Article Type:                   | Research                                                                                                                                                                                                                                                   |
| Date Submitted by the Author:   | 31-Jan-2018                                                                                                                                                                                                                                                |
| Complete List of Authors:       | Slater, Natasha; Keele University School of Pharmacy, Pharmacy<br>White, Simon; Keele University School of Pharmacy, Pharmacy<br>Venables, Rebecca; Keele University, School of Pharmacy<br>Frisher, Martin; Keele University School of Pharmacy, Pharmacy |
| <b>Primary Subject Heading</b>: | Public health                                                                                                                                                                                                                                              |
| Secondary Subject Heading:      | Geriatric medicine                                                                                                                                                                                                                                         |
| Keywords:                       | polypharmacy, longitudinal, older people, hyper-polypharmacy                                                                                                                                                                                               |
|                                 |                                                                                                                                                                                                                                                            |

SCHOLARONE™  
Manuscripts

1

2  
3  
4  
5  
6  
7  
8  
9  
10  
11  
12  
13  
14  
15  
16  
17  
18  
19  
20  
21  
22  
23  
24  
25  
26  
27  
28  
29  
30  
31  
32  
33  
34  
35  
36  
37  
38  
39  
40  
41  
42  
43  
44  
45  
46  
47  
48  
49  
50  
51  
52  
53  
54  
55  
56  
57  
58  
59  
60

Factors associated with polypharmacy in primary care: A cross-sectional analysis of data from The English Longitudinal Study of Ageing (ELSA)

**Authors:**

Natasha Slater, Simon White, Rebecca Venables, Martin Frisher

School of Pharmacy, Keele University, Staffordshire, ST5 5BG, United Kingdom  
Natasha Slater PhD Student School of Pharmacy, Keele University  
Simon White Senior Lecturer School of Pharmacy, Keele University  
Rebecca Venables Lecturer School of Pharmacy, Keele University  
Martin Frisher Reader School of Pharmacy, Keele University

**Correspondence to:** [n.slater@keele.ac.uk](mailto:n.slater@keele.ac.uk)

1

2

**ABSTRACT:**

**OBJECTIVES:** While older age and ill-health are known to be associated with polypharmacy, this paper aims to identify whether wealth, body mass index (BMI), smoking and alcohol consumption are also contributing to polypharmacy (5-9 prescribed medications) and hyper-polypharmacy prevalence ( $\geq 10$  prescribed medications), among older people living in England.

**DESIGN:** Cross-sectional study

**SETTING:** The English Longitudinal Study of Ageing Wave 6 (2012-2013)

**PARTICIPANTS:** 7730 participants aged over 50 years old

**DATA SYNTHESIS:** Two multivariate models were created. Hazard ratios (HR) with corresponding 95% confidence intervals (CI), for polypharmacy and hyper-polypharmacy, were calculated after adjusting for gender, age, wealth, smoking, alcohol consumption, BMI, self-rated health and the presence of a chronic health condition.

**RESULTS:** Lower wealth (adjusted HR highest wealth quintile versus lowest wealth quintile, 1.28; 95%CI, 1.04-1.69,  $p=0.02$ ) and obesity (adjusted HR 1.81; 95%CI, 1.53-2.15,  $p<0.001$ ) were significantly associated with polypharmacy. Increasing age (adjusted HR 50-59 years versus 70-79 years, 3.42; 95% CI, 2.81-4.77,  $p<0.001$ ) and the presence of a chronic health condition (adjusted HR 2.94; 95%CI, 2.55-3.99,  $p<0.001$ ) were also associated with polypharmacy. No statistically significant association between smoking and polypharmacy (adjusted HR 1.06; 95% CI, 0.86-1.29,  $p=0.56$ ) was established; whilst, very frequent alcohol consumption (consuming alcohol  $>5$  times per week) was inversely associated with polypharmacy (adjusted HR never drank versus very frequently, 0.64; 95%CI, 0.52-0.78,  $p<0.001$ ). The adjusted hazard ratios for hyper-polypharmacy were accentuated, compared to polypharmacy.

**CONCLUSION:** This study has identified that lower wealth, obesity, increasing age and chronic health conditions are significantly associated with polypharmacy and hyper-polypharmacy prevalence. The effect of these factors, on polypharmacy and especially hyper-polypharmacy prevalence, is likely to become more pronounced with the widening gap in UK wealth inequalities, the current obesity epidemic and the growing population of older people. The alcohol findings contribute to the debate on the relationship between alcohol consumption and health.

**Keywords:** polypharmacy, longitudinal, demography, older people

2

## STRENGTHS AND LIMITATIONS OF THIS STUDY

- This cross-sectional study uses medication data, from over 7000 older individuals, to identify factors which are associated with polypharmacy prevalence in primary care.
- In the analysis, a large number of covariates were used to minimise the impact of confounding factors.
- Participants were asked to self-report information about their prescribed medication usage. To verify their responses, participants were asked to show their medication containers to the interviewer.
- Smoking and alcohol consumption data was also collected by asking participants to self-report. This relies on accurate and truthful information recall to prevent bias.

## INTRODUCTION

Polypharmacy has been discussed extensively in the literature and media; however, there is no universally accepted definition for the practice of prescribing multiple medications to one individual. [1] At present, polypharmacy is commonly defined as “the use of five or more regular medications”, whilst hyper-polypharmacy, which is sometimes termed as “excessive polypharmacy”, is defined as “the use of ten or more regular medications”. [2] Although polypharmacy prevalence has increased over the past decade, there are relatively few data about the factors associated with polypharmacy and hyper-polypharmacy in primary care.[3]

Previous studies have shown that increasing age and the presence of chronic conditions are significantly associated with an increase in polypharmacy prevalence. [4-6] Comparatively fewer studies have examined whether socio-demographic or lifestyle factors, for example wealth and obesity, are associated with polypharmacy. In a study conducted by Haider et al, [7] no statistically significant association between polypharmacy and an individual’s socio-economic status was established. The findings from a study by Rajska-Neumann [8] revealed that there was no statistically significant difference in polypharmacy prevalence between smokers and non-smokers; whereas a statistically significant inverse relationship between alcohol consumption and the concomitant administration of medications was detected by Wong et al. [9] Finally, when Bueno et al [10] examined the association between polypharmacy and obesity, an adjusted odds ratio revealed that obese individuals (BMI  $>30\text{kg/m}^2$ ) were 1.6 times more likely to be experiencing polypharmacy, compared to individuals with a BMI less than  $30\text{kg/m}^2$ . To evaluate the relationship between the aforementioned factors and polypharmacy prevalence in primary care, a large sample study is required.

This study used data from The English Longitudinal Study of Ageing (ELSA) as this provided an opportunity to link polypharmacy and hyper-polypharmacy data to participants’ personal data. In particular, this study aimed to determine whether wealth, body mass index (BMI), smoking, alcohol consumption, age and the presence of chronic health conditions, are associated with polypharmacy (5-9 prescribed medications) and hyper-polypharmacy ( $\geq 10$  prescribed medications) prevalence in a community population of older people living in England.

## METHOD

### Sample and participants

A cross-sectional study was conducted using Wave 6 data from The English Longitudinal Study of Ageing (ELSA). Data collection took place between May 2012 and June 2013, from a representative sample of the English population who were aged 50 years or above.

Since ELSA began in 2002, participants have been asked to provide personal information about their household finances, health status, lifestyle choices and social interactions, on a bi-annual basis. In Wave 6, information from 10,601 participants was collected, which included 9,169 'core' participants. Members were considered 'core' if they were aged over 50 years old at the time of study enrollment and living at private residential addresses in England. [11] 8,054 nurse visits were completed at Wave 6, of whom 7,730 were carried out with core members. This latter group are the focus of the current study. [11]

### Patient Involvement and Ethics

Ethical approval for ELSA Wave 6 was granted from the National Research Ethics Committee under the National Research and Ethics Service (NRES). All participants were required to provide informed written consent. [12] All ELSA data is anonymous and freely accessible from the UK Data Service Discover. [13] Only data contained within the ELSA database was included in the analyses. No patients were involved in the development of the research question, study design or interpretation of the data in this study; therefore, ethical approval was not required for this study.

### Data Collection

#### Face-to-face interviews

The face-to-face interviews were conducted by trained interviewers, who asked participants to provide information about their current lifestyle choices, including smoking habits and alcohol consumption over the past twelve months. Smoking status was recorded as current smoker or non-smoker; whereas, the frequency of alcohol consumption over the past year was recorded as never, rarely, frequently or very frequently. [14] Rarely was defined as drinking alcohol less than twice a month. Frequently was defined as drinking alcohol between one and four times a week; whilst, very frequently was defined as drinking alcohol at least five times a week.

Participants were also asked to describe their current health status. Participants could select one of the following options: "excellent, very good, good, fair or poor". [15] These responses were converted into a two-level variable: good/fair and poor, with good/fair health status being the sum of responses ranging from "excellent" to "fair". In a subsequent question, participants were asked whether they had any chronic health conditions. Participants could answer this question with either yes or no. [15].

Finally, participants were asked to provide information about their household income, including information about their employment status, personal finances, assets, pensions and other benefits. Participant pension data was excluded when wealth index scores were calculated. Based upon their wealth index scores, participants were allocated to one of five wealth quintiles. Quintile 1 was the most affluent, whilst quintile 5 was the poorest.

## Questionnaire

After completion of the face-to-face interview, participants were asked to complete a paper-based questionnaire. The questionnaire was designed to obtain further information about the participants' living arrangements, health status, lifestyle choices and social interactions. [16]

## Nurse visit

The nurse visits took place in the participant's home. At the beginning of the visit, the nurse recorded information about participant demographics and their currently prescribed medications. Prescribed medication formulations were defined by the nurses as "pills, syrups, ointments, inhalers or injections". [17] If a participant reported taking one or more prescribed medications, the nurse sought their permission to record the name of their medication, in addition to seeing its container. The nurse determined current medication usage by asking the participant to confirm whether they had taken or used each reported medicine within the last seven days. [17] A maximum of 27 prescribed medications could be recorded for each participant. Medication information was coded by the nurse, according to the British National Formulary (Edition 61) chapter and subsection.

During the latter part of the visit, the nurse conducted a physical examination and recorded information about the participant's blood pressure, grip strength, height, weight and lung function. [17] Using a participant's height and weight data, it was possible to calculate their body mass index. A BMI  $<18.5\text{kg/m}^2$  was recorded as underweight, a BMI value between  $18.5 - 24.9\text{kg/m}^2$  was considered to be normal weight; whereas, a BMI of  $25.0 - 29.9\text{kg/m}^2$  was recorded as overweight and a BMI  $>30\text{kg/m}^2$  was recorded as obese.

## Inclusion Criteria

All participants must have completed a face-to-face interview, a paper-based questionnaire and received a nurse visit during ELSA Wave 6 to meet the inclusion criteria for this study. [18]

## Defining polypharmacy and hyper-polypharmacy

Polypharmacy was defined as the concurrent use of five to nine currently prescribed medications, whilst hyper-polypharmacy was defined as the concurrent use of ten or more currently prescribed medications. These definitions have been used previously in other population-based studies. [3,19]

## Data analysis

Initially, descriptive statistics were used to summarise the prevalence of polypharmacy and hyper-polypharmacy among participants. These data were subsequently stratified according to participant demographics. In the second part of the analysis, a bivariate model was used to assess the relationship between polypharmacy and the following independent variables: frequent alcohol consumption, increasing age, poor wealth, female sex, smoking, raised body mass index (BMI), poor self-rated health and the presence of a chronic health condition. Bivariate correlations between other covariates were also examined. Findings were presented as Pearson correlation coefficients ( $r$ ). The strength of each correlation was considered and described as either strong (1.00 – 0.50), moderate (0.49-0.30) or weak (0.29-0.10).[20]

In the final part of the analysis, two multivariate models were created to identify associations between participant characteristics and polypharmacy prevalence. Based upon previous work by Peduzzi et al [21], the minimum sample size required for the first multivariate model (polypharmacy) was 333; whilst the minimum sample size required for the second multivariate model (hyper-polypharmacy) was 1250. In both models, ill health was controlled for by using participants taking between one and four prescribed medications. This group of participants formed the control group. Participants taking no prescribed medications were excluded from this part of the analysis. In the first model, participants taking 5 to 9 medications were compared to the control group (1 to 4 prescribed medications). In the second model, participants taking 10 or more medications were compared to the control group (1 to 4 prescribed medications). Hazard ratios with corresponding 95% confidence intervals (CI), for polypharmacy and hyper-polypharmacy, were calculated after adjusting for covariates. The following factors were considered as covariates: gender, age, wealth, smoking, alcohol consumption, BMI, self-rated health and the presence of a chronic health condition. Missing data was coded as “missing” and presented as a separate category in the multivariate models. The data generated from the models was statistically significant if  $p < 0.05$ . All data analysis was undertaken using SPSS version 24.0.

## RESULTS

### Participant Characteristics:

A total of 7730 participants' data from ELSA Wave 6 were analysed. Participant characteristics are presented in Table 1. The mean age of participants in Wave 6 was 67.6 years, and 55.4% ( $n=4282/7730$ ) of the sample were female. Overall, 24.1% ( $n=1862/7725$ ) of the participants received polypharmacy and 6.4% ( $n=494/7725$ ) were receiving hyper-polypharmacy (Table 1). The proportion of individuals receiving polypharmacy and hyper-polypharmacy increased steadily with age. However, the prevalence of polypharmacy and hyper-polypharmacy in males and females was similar. (Table 1)

|                                     | No medications | 1-4 medications | 5-9 medications     | ≥10 medications           |
|-------------------------------------|----------------|-----------------|---------------------|---------------------------|
| <b>Participant Characteristics:</b> |                |                 | <b>Polypharmacy</b> | <b>Hyper-polypharmacy</b> |
| All participants ( $n=7725$ )       | 23.8%          | 45.7%           | 24.1%               | 6.4%                      |
| Missing medication data ( $n=5$ )   |                |                 |                     |                           |
| <b>Age:</b>                         |                |                 |                     |                           |
| 50-59 years ( $n=1695$ )            | 43.2%          | 42.4%           | 11.7%               | 2.7%                      |
| 60-69 years ( $n=3012$ )            | 26.6%          | 49.2%           | 19.6%               | 4.6%                      |
| 70-79 years ( $n=2114$ )            | 11.8%          | 45.9%           | 33.1%               | 9.2%                      |
| 80+ years ( $n=909$ )               | 6.4%           | 39.6%           | 41.3%               | 12.7%                     |
| <b>Gender:</b>                      |                |                 |                     |                           |
| Male ( $n=3448$ )                   | 24.9%          | 44.6%           | 24.4%               | 6.1%                      |
| Female ( $n=4282$ )                 | 22.9%          | 46.6%           | 23.9%               | 6.6%                      |
| <b>Chronic health condition:</b>    |                |                 |                     |                           |
| Yes ( $n=4289$ )                    | 9.6%           | 44.5%           | 35.2%               | 10.7%                     |
| No ( $n=3441$ )                     | 41.6%          | 47.1%           | 10.3%               | 1.0%                      |

**Table 1: Polypharmacy versus patient characteristics**



7

Overall, 35.2% (n= 1509/4289) of participants who reported having a chronic health condition were receiving polypharmacy; whereas, 10.7% (n=459/4289) were receiving hyper-polypharmacy. Only 10.3% (n=353/3441) and 1.0% (n=35/3441) of participants with no chronic health conditions, received polypharmacy and hyper-polypharmacy respectively (Table 1).

In a bivariate model, moderate positive correlations were detected between polypharmacy and the following variables: the presence of a chronic health condition, poor self-rated health and increasing age. A weak positive correlation between polypharmacy and a high BMI was established. Similarly, there was a weak positive correlation between lower wealth and polypharmacy. No correlations between gender and polypharmacy, and smoking and polypharmacy, were established. However, there was a weak negative correlation between polypharmacy and frequent alcohol consumption. All bivariate correlations are presented in Figure 1. Bivariate correlations between other covariates were also examined, and data is available in online supplementary table 1.

To determine whether other variables are associated with polypharmacy and hyper-polypharmacy, the results from the two multivariate models (Polypharmacy-1 and Hyper-polypharmacy-2) were analysed and presented in Table 2 and Table 3 respectively.

| Independent Variables                                                   | Adjusted HR | 95% CI |       | Sig.  |
|-------------------------------------------------------------------------|-------------|--------|-------|-------|
|                                                                         |             | Lower  | Upper |       |
| <b>Age</b>                                                              |             |        |       |       |
| 50-59 years ( <b>Reference</b> ) (n=963)                                | 1           |        |       |       |
| 60-69 years (n=2210)                                                    | 1.66        | 1.37   | 2.01  | <0.00 |
| 70-79 years (n=2344)                                                    | 3.42        | 2.81   | 4.77  | <0.00 |
| 80+ (n=371)                                                             | 4.52        | 3.58   | 5.70  | <0.00 |
| <b>Gender</b>                                                           |             |        |       |       |
| Male ( <b>Reference</b> ) (n=2588)                                      | 1           |        |       |       |
| Female (n=3300)                                                         | 0.92        | 0.81   | 1.04  | 0.21  |
| <b>Chronic health condition</b>                                         |             |        |       |       |
| No ( <b>Reference</b> ) (n=2008)                                        | 1           |        |       |       |
| Yes (n=3879)                                                            | 2.94        | 2.55   | 3.39  | 0.00  |
| Missing chronic health condition data (n=1)                             |             |        |       |       |
| <b>Self-rated health</b>                                                |             |        |       |       |
| Self-rated health: Good ( <b>Reference</b> ) (n=3907)                   | 1           |        |       |       |
| Self-rated health: Poor (n=1978)                                        | 2.98        | 2.61   | 3.4   | 0.00  |
| Missing self-rated health data (n=3)                                    |             |        |       |       |
| <b>Wealth</b>                                                           |             |        |       |       |
| Wealth: Quintile 1 (wealthiest) ( <b>Reference</b> ) (n=1237)           | 1           |        |       |       |
| Wealth: Quintile 2 (n=1244)                                             | 1.08        | 0.9    | 1.31  | 0.37  |
| Wealth: Quintile 3 (n=1196)                                             | 1.13        | 0.93   | 1.37  | 0.19  |
| Wealth: Quintile 4 (n=1190)                                             | 1.23        | 1.02   | 1.5   | 0.03  |
| Wealth: Quintile 5 (poorest) (n=921)                                    | 1.28        | 1.04   | 1.69  | 0.02  |
| Missing wealth data (n=100)                                             |             |        |       |       |
| <b>Body Mass Index (BMI)</b>                                            |             |        |       |       |
| BMI<18.5kg/m <sup>2</sup> : underweight (n=54)                          | 0.93        | 0.5    | 1.74  | 0.83  |
| BMI 18.5 -24.9 kg/m <sup>2</sup> : normal ( <b>Reference</b> ) (n=1313) | 1           |        |       |       |
| BMI 25.0-29.9kg/m <sup>2</sup> : overweight (n=2272)                    | 1.13        | 0.96   | 1.33  | 0.13  |

7

8

|                                                         |      |      |      |             |
|---------------------------------------------------------|------|------|------|-------------|
| BMI >30kg/m <sup>2</sup> : obese (n=1930)               | 1.81 | 1.53 | 2.15 | <b>0.00</b> |
| Missing BMI data (n=319)                                |      |      |      |             |
| <b>Current smoking habits since last ELSA interview</b> |      |      |      |             |
| Non-smoker ( <b>Reference</b> ) (n=3153)                | 1    |      |      |             |
| Smoker (n=650)                                          | 1.06 | 0.86 | 1.29 | 0.56        |
| Missing smoking data (n=2085)                           |      |      |      |             |
| <b>Alcohol consumption in past 12 months</b>            |      |      |      |             |
| Never ( <b>Reference</b> ) (n=792)                      | 1    |      |      |             |
| Rarely (n=930)                                          | 0.76 | 0.61 | 0.94 | <b>0.01</b> |
| Frequently (n=1797)                                     | 0.65 | 0.53 | 0.79 | <b>0.00</b> |
| Very frequently (n=1791)                                | 0.64 | 0.52 | 0.78 | <b>0.00</b> |
| Missing alcohol consumption data (n=578)                |      |      |      |             |

**Table 2: Model 1: Independent variables in polypharmacy (5-9 medications, n=2356) versus no polypharmacy (1-4 medications, n=3532)**

| Independent Variables                                                  | Adjusted HR | 95% CI |       | Sig.          |
|------------------------------------------------------------------------|-------------|--------|-------|---------------|
|                                                                        |             | Lower  | Upper |               |
| <b>Age</b>                                                             |             |        |       |               |
| 50-59 years ( <b>Reference</b> ) (n=765)                               | 1           |        |       |               |
| 60-69 years (n=1620)                                                   | 1.79        | 1.21   | 2.64  | < <b>0.00</b> |
| 70-79 years (n=1444)                                                   | 4.11        | 2.77   | 6.09  | < <b>0.00</b> |
| 80+ (n=197)                                                            | 5.94        | 3.79   | 9.29  | < <b>0.00</b> |
| <b>Gender</b>                                                          |             |        |       |               |
| Male ( <b>Reference</b> ) (n=1748)                                     | 1           |        |       |               |
| Female (n=2278)                                                        | 0.94        | 0.71   | 1.15  | 0.41          |
| <b>Chronic health condition</b>                                        |             |        |       |               |
| No ( <b>Reference</b> ) (n=1656)                                       | 1           |        |       |               |
| Yes (n=2370)                                                           | 5.30        | 3.63   | 7.73  | <b>0.00</b>   |
| <b>Self-rated health</b>                                               |             |        |       |               |
| Self-rated health: Good ( <b>Reference</b> ) (n=2944)                  | 1           |        |       |               |
| Self-rated health: Poor (n=1081)                                       | 6.69        | 5.21   | 8.58  | <b>0.00</b>   |
| Missing self-rated health data (n=1)                                   |             |        |       |               |
| <b>Wealth</b>                                                          |             |        |       |               |
| Wealth: Quintile 1 (wealthiest) ( <b>Reference</b> ) (n=907)           | 1           |        |       |               |
| Wealth: Quintile 2 (n=875)                                             | 1.41        | 0.93   | 2.13  | 0.11          |
| Wealth: Quintile 3 (n=797)                                             | 1.36        | 0.90   | 2.06  | 0.15          |
| Wealth: Quintile 4 (n=756)                                             | 1.75        | 1.17   | 2.60  | <b>0.006</b>  |
| Wealth: Quintile 5 (poorest) (n=611)                                   | 2.04        | 1.34   | 3.11  | <b>0.001</b>  |
| Missing wealth data (n=80)                                             |             |        |       |               |
| <b>Body Mass Index (BMI)</b>                                           |             |        |       |               |
| BMI <18.5kg/m <sup>2</sup> : underweight (n=38)                        | 0.88        | 0.26   | 2.95  | 0.83          |
| BMI 18.5 -24.9 kg/m <sup>2</sup> : normal ( <b>Reference</b> ) (n=959) | 1           |        |       |               |
| BMI 25.0-29.9kg/m <sup>2</sup> : overweight (n=1633)                   | 1.38        | 0.98   | 1.95  | 0.07          |
| BMI >30kg/m <sup>2</sup> : obese (n=1205)                              | 2.28        | 1.63   | 3.21  | <b>0.00</b>   |
| Missing BMI data (n=191)                                               |             |        |       |               |

8

|                                                         |      |      |      |              |
|---------------------------------------------------------|------|------|------|--------------|
| <b>Current smoking habits since last ELSA interview</b> |      |      |      |              |
| Non-smoker ( <b>Reference</b> ) (n=2077)                | 1    |      |      |              |
| Smoker (n=424)                                          | 0.98 | 0.68 | 1.39 | 0.89         |
| Missing smoking data (n=1525)                           |      |      |      |              |
| <b>Alcohol consumption in past 12 months</b>            |      |      |      |              |
| Never ( <b>Reference</b> ) (n=489)                      | 1    |      |      |              |
| Rarely (n=619)                                          | 0.70 | 0.50 | 0.99 | <b>0.046</b> |
| Frequently (n=1256)                                     | 0.40 | 0.29 | 0.56 | <b>0.00</b>  |
| Very frequently (n=1293)                                | 0.39 | 0.27 | 0.55 | <b>0.00</b>  |
| Missing alcohol consumption data (n=369)                |      |      |      |              |

**Table 3: Model 2: Independent variables in hyper-polypharmacy ( $\geq 10$  medications, n=494) versus no polypharmacy (1-4 medications, n=3532)**

### Examining the association between age and polypharmacy

In both models, increasing age was associated with polypharmacy and hyper-polypharmacy. For participants aged between 70 years and 79 years, the adjusted hazard ratio for polypharmacy was 3.42 (2.81 to 4.77,  $p < 0.001$ ) (Table 2). This value increased to 4.52 (3.58 to 5.70,  $p < 0.001$ ) in participants aged above 80 years old (Table 2). Similarly, the adjusted hazard ratios for hyper-polypharmacy increased from 4.11 (2.77 to 6.09,  $p < 0.001$ ) in participants aged between 70 years and 79 years to 5.94 (3.79 to 9.29,  $p < 0.001$ ) in participants aged above 80 years old (Table 3). All findings were statistically significant.

### Examining the association between the presence of a chronic health condition and polypharmacy

The adjusted hazard ratio for polypharmacy and the presence of a chronic health condition was 2.94 (2.55 to 3.39,  $p < 0.001$ ) (Table 2); whereas, the adjusted hazard ratio for hyper-polypharmacy and the presence of a chronic health condition was 5.30 (3.63 to 7.73,  $p < 0.001$ ) (Table 3). In both models, statistically significant results were generated.

### Examining the association between wealth and polypharmacy

The adjusted hazard ratio for polypharmacy increased from 1.08 (0.9 to 1.31,  $p = 0.37$ ) in wealth quintile 2 to 1.28 (1.04 to 1.69,  $p = 0.02$ ) in wealth quintile 5 (Table 2). Similarly, the adjusted hazard ratio for hyper-polypharmacy increased from 1.41 (0.93 to 2.13,  $p = 0.11$ ) in wealth quintile 2 to 2.04 (1.34 to 3.11,  $p = 0.001$ ) in wealth quintile 5 (Table 3). In both models, statistically significant differences in adjusted hazard ratios for polypharmacy and hyper-polypharmacy were detected in the lower wealth quintiles (quintile 4 and 5).

### Examining the association between BMI and polypharmacy

In underweight participants, the adjusted hazard ratio for polypharmacy was 0.93 (0.5 to 1.74,  $p = 0.83$ ) (Table 2); whereas, the adjusted hazard ratios for polypharmacy in participants who were overweight or obese were 1.13 (0.96 to 1.33,  $p = 0.13$ ) and 1.81 (1.53 to 2.15,  $p < 0.001$ ) respectively (Table 2). Adjusted hazard ratios for hyper-polypharmacy produced similar results. In underweight participants, the adjusted hazard ratio for hyper-polypharmacy decreased to 0.88 (0.26 to 2.95,  $p = 0.83$ ) (Table 3); whereas, the adjusted hazard ratio for hyper-polypharmacy in overweight participants was 1.38 (0.98 to 1.95,  $p = 0.07$ ) increasing

1  
2  
3 substantially to 2.28 (1.63 to 3.21,  $p<0.001$ ) in obese participants (Table 3). Only the adjusted  
4 hazard ratios for polypharmacy and hyper-polypharmacy, in relation to obesity, produced  
5 statistically significant results.  
6

### 7 **Examining the association between smoking and polypharmacy**

8  
9 The adjusted hazard ratio for polypharmacy and smoking was 1.06 (0.86 to 1.29,  $p=0.56$ )  
10 (Table 2) whereas the adjusted hazard ratio for hyper-polypharmacy and smoking was 0.98  
11 (0.68 to 1.39,  $p=0.89$ ) (Table 3). Both models failed to produce any statistically significant  
12 results.  
13

### 14 **Examining the association between alcohol consumption and polypharmacy**

15  
16 Adjusted hazard ratios for polypharmacy and hyper-polypharmacy were calculated using the  
17 participant's alcohol consumption data provided during the face-to-face interview. When  
18 compared to individuals who reported never drinking alcohol, the adjusted hazard ratio for  
19 participants who reported rarely consuming alcohol was 0.76 (0.61 to 0.94,  $p=0.01$ ) (Table  
20 2). This value decreased further to 0.64 (0.52 to 0.78,  $p<0.001$ ) in participants who reported  
21 drinking alcohol very frequently (Table 2). The adjusted hazard ratios for hyper-  
22 polypharmacy produced similar results. For participants who reported rarely consuming  
23 alcohol, the adjusted hazard ratio for hyper-polypharmacy was 0.70 (0.50 to 0.99,  $p=0.046$ ),  
24 when compared to individuals who reported never drinking alcohol (Table 3); whereas the  
25 adjusted hazard ratio for hyper-polypharmacy in participants who reported drinking alcohol  
26 frequently was 0.39 (0.27 to 0.55,  $p<0.001$ ) (Table 3). All adjusted hazard ratios for  
27 polypharmacy and hyper-polypharmacy, in relation to self-reported alcohol consumption,  
28 were statistically significant.  
29  
30

## 31 **DISCUSSION**

32  
33 This study confirms that increasing age and the presence of chronic health conditions are  
34 associated with polypharmacy prevalence, but also that obesity and lower wealth are  
35 significantly associated with polypharmacy. Frequent alcohol consumption is inversely  
36 associated with polypharmacy prevalence. Results from previous studies, which have  
37 investigated the influence of ageing and chronic health conditions on polypharmacy  
38 prevalence, complement our findings. [19,22,23].  
39  
40

41 In the existing literature, few studies have investigated whether polypharmacy prevalence is  
42 associated with wealth or BMI. [24,25] One study conducted in Rome, analysed a national  
43 prescription database and a multivariate model was used to identify participant characteristics  
44 which influenced polypharmacy prevalence. [24] The authors concluded that individuals  
45 living in lower socio-economic areas are 33% more likely to experience polypharmacy  
46 compared to individuals living in higher socio-economic areas. In our study, participants  
47 were allocated to one of five wealth quintiles, based upon their wealth index scores.  
48 Participants living in the lowest wealth quintiles were 28% more likely to experience  
49 polypharmacy and twice as likely to experience hyper-polypharmacy, when compared to  
50 participants living in the highest wealth quintile. Our findings show that lower wealth is  
51 significantly associated with an increase in polypharmacy and hyper-polypharmacy  
52 prevalence. This finding is important because the latest figures published by the Office of  
53 National Statistics [25] show that wealth inequalities across the United Kingdom (UK) have  
54 begun to rise again, after a decade-long decline. There is also evidence to suggest that the  
55  
56  
57

1  
2  
3 incidence of chronic health conditions and multi-morbidities is highest among individuals  
4 residing in deprived areas. [26,27] The aforementioned individuals are likely to require  
5 multiple medications to manage or treat their chronic conditions and thus, providing support  
6 for the association between lower wealth and polypharmacy.  
7

8 Our multivariate model also revealed that obesity (body mass index  $>30\text{kg/m}^2$ ) was another  
9 factor associated with polypharmacy and hyper-polypharmacy prevalence. This finding was  
10 statistically significant. The same association was identified during another study; however,  
11 the authors did not comment on the statistical significance of their results, nor did they  
12 conduct any further research into the association. [28] Identifying the association between  
13 polypharmacy and obesity is also important because obesity has become a major public  
14 health concern in England. Assuming the current obesity epidemic continues as predicted, the  
15 prevalence of polypharmacy and hyper-polypharmacy among older people in England, is  
16 likely to follow suit. [29]  
17  
18

19 This study found no statistically significant association between smoking and polypharmacy.  
20 Similarly, there were no statistically significant association between smoking and hyper-  
21 polypharmacy. Our findings are supported by Rajska-Neumann [8] and Henderson et al [30].  
22 However, another study reports that smoking is inversely associated with polypharmacy  
23 (adjusted OR 0.42;95%CI,0.33-0.53). [31]  
24  
25

26 Frequent alcohol consumption in the past year was inversely associated with polypharmacy  
27 and hyper-polypharmacy prevalence. This finding is consistent with previous work, involving  
28 ELSA, which reported that self-reported alcohol consumption (even at high levels) was not  
29 related to poor self-rated health. [32,33] The alcohol findings in this current study could be  
30 explained by the sick quitter hypothesis, where individuals stop or reduce their alcohol  
31 consumption due to illness. [34] However, Rimm and Moats [35] conclude that the sick  
32 quitter hypothesis has been refuted by a wide range of evidence. The inverse association  
33 between alcohol consumption and polypharmacy was also detected by Incalzi et al [31]  
34 although they appear to discount a genuine association and rather attribute this to bias (i.e.  
35 patients in better health are less motivated to correct unhealthy habits).  
36  
37

38 Finally, most of the existing literature suggests that females take more medications compared  
39 to males; however, our study found that there was no statistically significant difference in  
40 polypharmacy and hyper-polypharmacy prevalence between males and females. [36,37,38]  
41 Pan et al [39] provides support for our findings and concluded that female sex is not  
42 significantly associated with an increased polypharmacy prevalence.  
43

44 To our knowledge this is the first study which has used medication data, from a large  
45 representative sample of older adults, to determine whether lower wealth, obesity, smoking,  
46 alcohol consumption, in addition to increasing age and the presence of chronic health  
47 conditions, are associated with polypharmacy and hyper-polypharmacy prevalence in primary  
48 care. All analysed data was obtained using standardised data collection methods and  
49 validated data collection tools. Also, this study used a large number of covariates, which  
50 reduced the impact of confounders and minimised study bias.  
51  
52

53 This study has several limitations. Actual medication use among participants may have been  
54 higher than recorded medication use for several reasons. Firstly, participants were asked  
55 about their prescribed medications; however, medications purchased without prescription, for  
56  
57

1  
2  
3 example weak analgesics or antihistamines, were not recorded. Secondly, prescribed  
4 medications were coded according to BNF chapter and subsection. It was assumed that each  
5 code represented a single active ingredient; however, several combination drugs, for example  
6 co-amlofruse and co-amlozide, were also represented by a single code. Furthermore, when  
7 the nurse enquired about prescribed medications, they asked the following question: “Are you  
8 taking or using any medications, pills, syrups, ointments, puffers or injections prescribed to  
9 you by a doctor or a nurse?” [19] This question refers to some medicinal formulations, but  
10 the list is not exhaustive. Thus, a participant using eye drops or wearing a transdermal patch  
11 may not have reported this medication as the formulation was not explicitly stated in the  
12 question. Consequently, polypharmacy and hyper-polypharmacy prevalence may have been  
13 underestimated in this study.  
14  
15

16 To obtain data about prescribed medications, smoking habits and alcohol consumption,  
17 participants were asked to self-report. This method of data collection relies on all participants  
18 accurately and truthfully recalling information to prevent bias. [40] The risk of recall bias  
19 associated with prescribed medication information was minimised by the nurse, because  
20 participants were asked to show their medication containers to verify their responses.  
21 However, it was not possible to minimise the risk of recall bias associated with the other  
22 covariates. Participants also reported information about chronic health conditions; however,  
23 the associations between specific health conditions, multi-morbidity and polypharmacy were  
24 not examined in this study. Finally, it is not possible to determine the direction of causality  
25 from our data, due to the cross-sectional nature of this study.  
26  
27

## 28 CONCLUSION

29  
30 This study has identified that lower wealth, obesity, increasing age and the presence of  
31 chronic health conditions are all associated with polypharmacy and hyper-polypharmacy  
32 prevalence, among older people in primary care. An inverse relationship between frequent  
33 alcohol consumption and polypharmacy prevalence was also established. In the future, the  
34 effect of obesity and lower wealth on polypharmacy and hyper-polypharmacy prevalence is  
35 likely to become more pronounced, as the gap in UK wealth inequalities begins to widen  
36 again and the UK obesity epidemic continues. Future exploratory work is required to  
37 determine the causation behind these associations.  
38  
39  
40

---

## 41 WHAT IS ALREADY KNOWN ABOUT THIS TOPIC

- 42 • The prevalence of polypharmacy and hyper-polypharmacy is increasing globally
- 43 • Increasing age and the presence of chronic health conditions are associated with an
- 44 increase in polypharmacy prevalence.
- 45 • Few studies have examined whether socio-demographic or lifestyle factors, for
- 46 example wealth and obesity, are associated with polypharmacy.
- 47
- 48
- 49
- 50
- 51
- 52

## 53 WHAT THIS STUDY ADDS

- 54 • Obesity and lower wealth have been identified as factors which are significantly
- 55 associated with polypharmacy and especially hyper-polypharmacy. As the gap in UK
- 56
- 57
- 58
- 59

1  
2  
3 wealth inequalities widens and the UK obesity epidemic continues, the effect these  
4 factors on polypharmacy prevalence is likely to become more pronounced.

- 5  
6 • Frequent alcohol consumption is inversely associated with polypharmacy and hyper-  
7 polypharmacy prevalence.  
8  
9

---

## 10 ACKNOWLEDGEMENTS

11  
12 The authors would like to thank the ELSA participants, the ELSA researchers and the UK  
13 Data Service for enabling the use of ELSA data for this analysis.  
14

## 15 CONTRIBUTORSHIP STATEMENT

16  
17 All authors contributed to the study idea. MF led the study and conducted all data analysis.  
18 All authors had full access to ELSA Wave 6 data, supplied by the UK Data Service and they  
19 take full responsibility for the integrity and accurate analysis of data. All authors contributed  
20 to data interpretation. NS drafted the manuscript with contributions from MF, RV and SW.  
21 NS and MF are the Guarantors for this study.  
22

## 23 TRANSPARENCY STATEMENT

24  
25 NS and MF confirm that the manuscript is an honest, accurate and transparent account of the  
26 study being reported. No important aspects of this study have been omitted.  
27

28  
29 **COMPETING INTERESTS** All authors have completed the ICMJE form for disclosure of  
30 potential conflicts of interest available from [www.icmje.org/coi\\_disclosure.pdf](http://www.icmje.org/coi_disclosure.pdf) and declare  
31 that there is nothing to disclose.  
32

33 **FUNDING** This study received no specific funding  
34

35 **DATA SHARING STATEMENT** No additional data is available; however, anonymous  
36 ELSA data is publicly available from <https://discover.ukdataservice.ac.uk/> [36]  
37

38 **COPYRIGHT/LICENSE FOR PUBLICATION:** The Corresponding Author has the right  
39 to grant on behalf of all authors and does grant on behalf of all authors, *a worldwide*  
40 *license* to the Publishers and its licensees in perpetuity, in all forms, formats and media  
41 (whether known now or created in the future), to i) publish, reproduce, distribute, display and  
42 store the Contribution, ii) translate the Contribution into other languages, create adaptations,  
43 reprints, include within collections and create summaries, extracts and/or, abstracts of the  
44 Contribution, iii) create any other derivative work(s) based on the Contribution, iv) to exploit  
45 all subsidiary rights in the Contribution, v) the inclusion of electronic links from the  
46 Contribution to third party material where-ever it may be located; and, vi) license any third  
47 party to do any or all of the above.  
48  
49

## 50 REFERENCES

- 51  
52 1. Duerden M, Payne R. Polypharmacy – what is it and how common is it? Prescriber. 2014 Nov  
53 2. O'Dwyer M, Peklar J, McCallion P, McCarron M, Henman MC. Factors associated with polypharmacy  
54 and excessive polypharmacy in older people with intellectual disability differ from the general  
55 population: a cross-sectional observational nationwide study. BMJ open. 2016 Apr 1;6(4):e010505.  
56 3. Guthrie B, Makubate B, Hernandez-Santiago V, Dreischulte T. The rising tide of polypharmacy and  
57 drug-drug interactions: population database analysis 1995–2010. BMC Med 2015;13:74  
58

4. The Dynamics of Ageing. Evidence from the English Longitudinal Study of Ageing (Wave 7) 2002-2015. Available from [www.ifs.org.uk/uploads/elsa/docs\\_w7/report.pdf](http://www.ifs.org.uk/uploads/elsa/docs_w7/report.pdf) [Accessed 27/07/2017]
5. Department of Health. Long Term Condition Compendium of Information. Third Edition. 2012 [www.gov.uk/government/uploads/attachment\\_data/file/216528/dh\\_134486.pdf](http://www.gov.uk/government/uploads/attachment_data/file/216528/dh_134486.pdf) [Accessed 27/07/2017]
6. Silveira EA, Dalastra L, Pagotto V. Polypharmacy, chronic diseases and nutritional markers in community-dwelling older. *Revista Brasileira de Epidemiologia*. 2014 Dec;17(4):818-29.
7. Haider SI, Johnell K, Thorslund M, Fastbom J. Analysis of the association between polypharmacy and socioeconomic position among elderly aged  $\geq 77$  years in Sweden. *Clinical therapeutics*. 2008 Feb 1;30(2):419-27.
8. Rajska-Neumann A, Szymański M, Balcer N, Grześkowiak E, Szalek E, Wieczorowska-Tobis K. Is smoking a determinant of polypharmacy among elderly subject?. *Przegląd lekarski*. 2004 Dec;62(10):1145-7.
9. Wong H, Heuberger R, Logomarsino J, Hewlings S. Associations between alcohol use, polypharmacy and falls in older adults: Helen Wong and colleagues report on a cross-sectional study into alcohol consumption, medication use and falls in the community. *Nursing older people*. 2016 Jan 28;28(1):30-6.
10. Bueno DR, Monteiro HL, Rosa CS, Codogno JS, Fernandes RA, Marucci MF. Association between physical activity levels and polypharmacy in hypertensive patients. *Medicina (Ribeirão Preto)*. Online. 2016;49(3):240-7.
11. Wade KF, Marshall A, Vanhoutte B, Wu FC, O'Neill TW, Lee DM. Does pain predict frailty in older men and women? Findings from the English Longitudinal Study of Ageing (ELSA). *The Journals of Gerontology: Series A*. 2017 Mar 1;72(3):403-9.
12. English Longitudinal Study of Ageing (ELSA) Wave 1 to Wave 6. Available from [http://doc.ukdataservice.ac.uk/doc/5050/mrdoc/pdf/5050\\_elsa\\_user\\_guide\\_waves\\_1-6\\_v3.pdf](http://doc.ukdataservice.ac.uk/doc/5050/mrdoc/pdf/5050_elsa_user_guide_waves_1-6_v3.pdf) [Accessed 8/12/2017]
13. UK Data Service Discover. English Longitudinal Study of Ageing. Available from <https://discover.ukdataservice.ac.uk/series/?sn=200011> [Accessed 8/12/2017]
14. Lee DM, Nazroo J, O'Connor DB, Blake M, Pendleton N. Sexual health and well-being among older men and women in England: findings from the English Longitudinal Study of Ageing. *Archives of sexual behavior*. 2016 Jan 1;45(1):133-44.
15. Nat Cen Social Research. English Longitudinal Study of Ageing Wave 6 interview questionnaire. Version 3.0 Available from [https://www.elsa-project.ac.uk/uploads/elsa/docs\\_w6/main\\_questionnaire.pdf](https://www.elsa-project.ac.uk/uploads/elsa/docs_w6/main_questionnaire.pdf) [Accessed 5/9/2017]
16. English Longitudinal Study of Ageing Health and Lifestyles of People aged 50 or over. Self-completion questionnaire. Available from [https://www.elsa-project.ac.uk/uploads/elsa/docs\\_w6/self\\_completion\\_main.pdf](https://www.elsa-project.ac.uk/uploads/elsa/docs_w6/self_completion_main.pdf) [Accessed 5/9/2017]
17. Nat Cen Social Research. English Longitudinal Study of Ageing Wave 6 Nurse questionnaire. 2012-2013. Available from [https://www.elsa-project.ac.uk/uploads/elsa/docs\\_w6/nurse\\_documentation.pdf](https://www.elsa-project.ac.uk/uploads/elsa/docs_w6/nurse_documentation.pdf) [Accessed 5/9/2017]
18. Steptoe A, Breeze E, Banks J, Nazroo J. Cohort profile: the English longitudinal study of ageing. *International journal of epidemiology*. 2012 Nov 6;42(6):1640-8.
19. Bjerrum L, Søgaard J, Hallas J, Kragstrup J. Polypharmacy: correlations with sex, age and drug regimen A prescription database study. *European journal of clinical pharmacology*. 1998 Jun 1;54(3):197-202
20. Statistical correlation. The relationship between two variables. Available from <https://explorable.com/statistical-correlation> [Accessed 8/12/2017]
21. Peduzzi P, Concato J, Kemper E, Holford TR, Feinstein AR. A simulation study of the number of events per variable in logistic regression analysis. *Journal of clinical epidemiology*. 1996 Dec 1;49(12):1373-9.
22. The Irish Longitudinal Study of Ageing. Main Questionnaire 2010. Available from <http://www.ucd.ie/issda/static/documentation/tilda/tilda-capi-qaire-wave1.pdf> [Accessed 5/9/2017]
23. Tjia J, Velten SJ, Parsons C, Valluri S, Briesacher BA. Studies to reduce unnecessary medication use in frail older adults: a systematic review. *Drugs & aging*. 2013 May 1;30(5):285-307.
24. Fano V, Chini F, Pezzotti P, Bontempi K. Estimating the Prevalence and the Determinants of Polypharmacy Using Data from a Health Administrative Database: A Comparison of Results Obtained Employing Different Algorithms. *Advances in Pharmacoepidemiology & Drug Safety*. 2014;3(151):2167-1052.
25. The Office of National Statistics Report: Chapter 2 Total Wealth, Wealth in GB, 2012-2014. Available from



- 1  
2  
3  
4  
5  
6  
7  
8  
9  
10  
11  
12  
13  
14  
15  
16  
17  
18  
19  
20  
21  
22  
23  
24  
25  
26  
27  
28  
29  
30  
31  
32  
33  
34  
35  
36  
37  
38  
39  
40
- <http://webarchive.nationalarchives.gov.uk/20160105170657/http://www.ons.gov.uk/ons/rel/was/wealth-in-great-britain-wave-4/2012-2014/rpt-chapter-2.html>
26. Kings Fund. Long term conditions. Available from <https://www.kingsfund.org.uk/projects/time-think-differently/trends-disease-and-disability-long-term-conditions-multi-morbidity>
  27. Barnett K, Mercer SW, Norbury M, Watt G, Wyke S, Guthrie B. Epidemiology of multimorbidity and implications for health care, research, and medical education: a cross-sectional study. *The Lancet*. 2012 Jul 13;380(9836):37-43.
  28. Team CP. The impact of obesity on drug prescribing in primary care. *The British Journal of General Practice*. 2005 Oct 1;55(519):743.
  29. Wang YC, McPherson K, Marsh T, Gortmaker SL, Brown M. Health and economic burden of the projected obesity trends in the USA and the UK. *The Lancet*. 2011 Sep 2;378(9793):815-25.
  30. Henderson JA, Buchwald D, Manson SM. Relationship of medication use to health-related quality of life among a group of older American Indians. *Journal of applied gerontology*. 2006 Feb;25(1\_suppl):89S-104S.
  31. Incalzi RA, Corsonello A, Pedone C, Corica F, Carbonin P. Depression and drug utilization in an elderly population. *Therapeutics and clinical risk management*. 2005 Mar;1(1):55.
  32. Frisher M, Mendonça M, Shelton N, Pikhart H, de Oliveira C, Holdsworth C. Is alcohol consumption in older adults associated with poor self-rated health? Cross-sectional and longitudinal analyses from the English Longitudinal Study of Ageing. *BMC public health*. 2015 Jul 24;15(1):703.
  33. Holdsworth C, Mendonca M, Pikhart H, Frisher M, de Oliveira C, Shelton N. Is regular drinking in later life an indicator of good health? Evidence from the English Longitudinal Study of Ageing. *J Epidemiol Community Health* 2016 Aug 1;70(8):764-70
  34. Shaper AG, Wannamethee G, Walker M. Alcohol and mortality in British men: Explaining the U-shaped curve. *Lancet*. 1988; 2:1267–1273.
  35. Rimm EB, Moats C. Alcohol and coronary heart disease: drinking patterns and mediators of effect. *Annals of Epidemiology*. 2007. May 31; 17(5): S3-7
  36. Kaufman DW, Kelly JP, Rosenberg L, Anderson TE, Mitchell AA. Recent patterns of medication use in the ambulatory adult population of the United States: the Slone survey. *Jama*. 2002 Jan 16;287(3):337-44.
  37. Schuler J, Dückelmann C, Beindl W, Prinz E, Michalski T, Pichler M. Polypharmacy and inappropriate prescribing in elderly internal-medicine patients in Austria. *Wiener klinische Wochenschrift*. 2008 Dec 1;120(23):733-41.
  38. Wauters M, Elseviers M, Vaes B, Degryse J, Dalleur O, Vander Stichele R, Van Bortel L, Azermai M. Polypharmacy in a Belgian cohort of community-dwelling oldest old (80+). *Acta Clinica Belgica*. 2016 May 3;71(3):158-66.
  39. Pan HH, Li CY, Chen TJ, Su TP, Wang KY. Association of polypharmacy with fall-related fractures in older Taiwanese people: age-and gender-specific analyses. *BMJ open*. 2014 Mar 1;4(3): e004428.
  40. Barker, C., Pistrang, N. and Elliott, R. (2002) *Self-Report Methods*, in *Research Methods in Clinical Psychology: An Introduction for Students and Practitioners*, Second Edition, John Wiley & Sons, Ltd, Chichester, UK. doi: 10.1002/0470013435.ch6

#### FIGURE LEGENDS:

Figure 1: Bivariate correlations between polypharmacy and covariates

41  
42  
43  
44  
45  
46  
47  
48  
49  
50  
51  
52  
53  
54  
55  
56  
57  
58  
59  
60

1  
2  
3  
4  
5  
6  
7  
8  
9  
10  
11  
12  
13  
14  
15  
16  
17  
18  
19  
20  
21  
22  
23  
24  
25  
26  
27  
28  
29  
30  
31  
32  
33  
34  
35  
36  
37  
38  
39  
40  
41  
42  
43  
44  
45  
46  
47  
48  
49  
50  
51  
52  
53  
54  
55  
56  
57  
58  
59  
60

For peer review only

1  
2  
3  
4  
5  
6  
7  
8  
9  
10  
11  
12  
13  
14  
15  
16  
17  
18  
19  
20  
21  
22  
23  
24  
25  
26  
27  
28  
29  
30  
31  
32  
33  
34  
35  
36  
37  
38  
39  
40  
41  
42  
43  
44  
45  
46  
47  
48  
49  
50  
51  
52  
53  
54  
55  
56  
57  
58  
59  
60



Figure 1: Bivariate correlations between polypharmacy and covariates

338x190mm (300 x 300 DPI)

Review only

**ONLINE SUPPLEMENTARY TABLE 1:**

|                                        | Frequent alcohol intake | Increased age | Low wealth | Smoking | Obesity | Poor self-rated health | Presence of a chronic health condition | Gender (female) | Polypharmacy |
|----------------------------------------|-------------------------|---------------|------------|---------|---------|------------------------|----------------------------------------|-----------------|--------------|
| Frequent alcohol intake                | 1                       | -0.106        | -0.251     | -0.108  | -0.094  | -0.220                 | -0.137                                 | -0.204          | -0.188       |
| Increased age                          | -0.106                  | 1             | -0.049     | -0.195  | -0.033  | 0.118                  | 0.141                                  | 0.010           | 0.353        |
| Low wealth                             | -0.251                  | -0.049        | 1          | 0.205   | 0.135   | 0.218                  | 0.107                                  | 0.059           | 0.149        |
| Smoking                                | -0.108                  | -0.195        | 0.205      | 1       | -0.117  | 0.107                  | 0.000                                  | 0.044           | -0.040       |
| Obesity                                | -0.094                  | -0.033        | 0.135      | -0.117  | 1       | 0.142                  | 0.115                                  | -0.030          | 0.187        |
| Poor self-rated health                 | -0.220                  | 0.118         | 0.218      | 0.107   | 0.142   | 1                      | 0.407                                  | -0.010          | 0.421        |
| Presence of a chronic health condition | -0.137                  | 0.141         | 0.107      | 0.000   | 0.115   | 0.407                  | 1                                      | 0.006           | 0.473        |
| Gender (female)                        | -0.204                  | 0.010         | 0.059      | 0.044   | -0.030  | -0.010                 | 0.006                                  | 1               | 0.011        |
| Poly-pharmacy                          | -0.188                  | 0.353         | 0.149      | -0.040  | 0.187   | 0.421                  | 0.473                                  | 0.011           | 1            |

Bivariate correlations between covariates

**STROBE 2007 (v4) Statement—Checklist of items that should be included in reports of *cross-sectional studies***

| Section/Topic                | Item # | Recommendation                                                                                                                                                                       | Reported on page # |
|------------------------------|--------|--------------------------------------------------------------------------------------------------------------------------------------------------------------------------------------|--------------------|
| <b>Title and abstract</b>    | 1      | (a) Indicate the study’s design with a commonly used term in the title or the abstract                                                                                               | 1                  |
|                              |        | (b) Provide in the abstract an informative and balanced summary of what was done and what was found                                                                                  | 2                  |
| <b>Introduction</b>          |        |                                                                                                                                                                                      |                    |
| Background/rationale         | 2      | Explain the scientific background and rationale for the investigation being reported                                                                                                 | 3                  |
| Objectives                   | 3      | State specific objectives, including any prespecified hypotheses                                                                                                                     | 3                  |
| <b>Methods</b>               |        |                                                                                                                                                                                      |                    |
| Study design                 | 4      | Present key elements of study design early in the paper                                                                                                                              | 4-5                |
| Setting                      | 5      | Describe the setting, locations, and relevant dates, including periods of recruitment, exposure, follow-up, and data collection                                                      | 4                  |
| Participants                 | 6      | (a) Give the eligibility criteria, and the sources and methods of selection of participants                                                                                          | 4-5                |
| Variables                    | 7      | Clearly define all outcomes, exposures, predictors, potential confounders, and effect modifiers. Give diagnostic criteria, if applicable                                             | 5-6                |
| Data sources/<br>measurement | 8*     | For each variable of interest, give sources of data and details of methods of assessment (measurement). Describe comparability of assessment methods if there is more than one group | 4-5                |
| Bias                         | 9      | Describe any efforts to address potential sources of bias                                                                                                                            | 12                 |
| Study size                   | 10     | Explain how the study size was arrived at                                                                                                                                            | 4                  |
| Quantitative variables       | 11     | Explain how quantitative variables were handled in the analyses. If applicable, describe which groupings were chosen and why                                                         | 4-6                |
| Statistical methods          | 12     | (a) Describe all statistical methods, including those used to control for confounding                                                                                                | 5-6                |
|                              |        | (b) Describe any methods used to examine subgroups and interactions                                                                                                                  | 5-6                |
|                              |        | (c) Explain how missing data were addressed                                                                                                                                          | 6                  |
|                              |        | (d) If applicable, describe analytical methods taking account of sampling strategy                                                                                                   |                    |
|                              |        | (e) Describe any sensitivity analyses                                                                                                                                                |                    |
| <b>Results</b>               |        |                                                                                                                                                                                      |                    |

|                          |     |                                                                                                                                                                                                                                                                                                                                                                                                               |            |
|--------------------------|-----|---------------------------------------------------------------------------------------------------------------------------------------------------------------------------------------------------------------------------------------------------------------------------------------------------------------------------------------------------------------------------------------------------------------|------------|
| Participants             | 13* | (a) Report numbers of individuals at each stage of study—eg numbers potentially eligible, examined for eligibility, confirmed eligible, included in the study, completing follow-up, and analysed<br>(b) Give reasons for non-participation at each stage<br>(c) Consider use of a flow diagram                                                                                                               | 6-9        |
| Descriptive data         | 14* | (a) Give characteristics of study participants (eg demographic, clinical, social) and information on exposures and potential confounders<br>(b) Indicate number of participants with missing data for each variable of interest                                                                                                                                                                               | 6<br>7-9   |
| Outcome data             | 15* | Report numbers of outcome events or summary measures                                                                                                                                                                                                                                                                                                                                                          | 7-9        |
| Main results             | 16  | (a) Give unadjusted estimates and, if applicable, confounder-adjusted estimates and their precision (eg, 95% confidence interval). Make clear which confounders were adjusted for and why they were included<br>(b) Report category boundaries when continuous variables were categorized<br>(c) If relevant, consider translating estimates of relative risk into absolute risk for a meaningful time period | 8-9<br>8-9 |
| Other analyses           | 17  | Report other analyses done—eg analyses of subgroups and interactions, and sensitivity analyses                                                                                                                                                                                                                                                                                                                |            |
| <b>Discussion</b>        |     |                                                                                                                                                                                                                                                                                                                                                                                                               |            |
| Key results              | 18  | Summarise key results with reference to study objectives                                                                                                                                                                                                                                                                                                                                                      | 10-12      |
| Limitations              | 19  | Discuss limitations of the study, taking into account sources of potential bias or imprecision. Discuss both direction and magnitude of any potential bias                                                                                                                                                                                                                                                    | 12         |
| Interpretation           | 20  | Give a cautious overall interpretation of results considering objectives, limitations, multiplicity of analyses, results from similar studies, and other relevant evidence                                                                                                                                                                                                                                    | 12-13      |
| Generalisability         | 21  | Discuss the generalisability (external validity) of the study results                                                                                                                                                                                                                                                                                                                                         | 13         |
| <b>Other information</b> |     |                                                                                                                                                                                                                                                                                                                                                                                                               |            |
| Funding                  | 22  | Give the source of funding and the role of the funders for the present study and, if applicable, for the original study on which the present article is based                                                                                                                                                                                                                                                 | N/A        |

\*Give information separately for cases and controls in case-control studies and, if applicable, for exposed and unexposed groups in cohort and cross-sectional studies.

**Note:** An Explanation and Elaboration article discusses each checklist item and gives methodological background and published examples of transparent reporting. The STROBE checklist is best used in conjunction with this article (freely available on the Web sites of PLoS Medicine at <http://www.plosmedicine.org/>, Annals of Internal Medicine at <http://www.annals.org/>, and Epidemiology at <http://www.epidem.com/>). Information on the STROBE Initiative is available at [www.strobe-statement.org](http://www.strobe-statement.org).
