# Supplementary material for: Factors associated with polypharmacy in primary care: a cross-sectional analysis of data from The English Longitudinal Study of Ageing (ELSA)
Source: PubMed Central journal article supplement — BMJ Open. 2018 Mar 14;8(3):e020270. doi: 10.1136/bmjopen-2017-020270 (PMC5857661; doi:10.1136/bmjopen-2017-020270), 2018-03-14
Supplement: bmjopen-2017-020270supp001.pdf [file bmjopen-2017-020270supp001.pdf]

**ONLINE SUPPLEMENTARY TABLE 1:**

|                                        | Frequent alcohol intake | Increased age | Low wealth | Smoking | Obesity | Poor self-rated health | Presence of a chronic health condition | Gender (female) | Polypharmacy |
|----------------------------------------|-------------------------|---------------|------------|---------|---------|------------------------|----------------------------------------|-----------------|--------------|
| Frequent alcohol intake                | 1                       | -0.106        | -0.251     | -0.108  | -0.094  | -0.220                 | -0.137                                 | -0.204          | -0.188       |
| Increased age                          | -0.106                  | 1             | -0.049     | -0.195  | -0.033  | 0.118                  | 0.141                                  | 0.010           | 0.353        |
| Low wealth                             | -0.251                  | -0.049        | 1          | 0.205   | 0.135   | 0.218                  | 0.107                                  | 0.059           | 0.149        |
| Smoking                                | -0.108                  | -0.195        | 0.205      | 1       | -0.117  | 0.107                  | 0.000                                  | 0.044           | -0.040       |
| Obesity                                | -0.094                  | -0.033        | 0.135      | -0.117  | 1       | 0.142                  | 0.115                                  | -0.030          | 0.187        |
| Poor self-rated health                 | -0.220                  | 0.118         | 0.218      | 0.107   | 0.142   | 1                      | 0.407                                  | -0.010          | 0.421        |
| Presence of a chronic health condition | -0.137                  | 0.141         | 0.107      | 0.000   | 0.115   | 0.407                  | 1                                      | 0.006           | 0.473        |
| Gender (female)                        | -0.204                  | 0.010         | 0.059      | 0.044   | -0.030  | -0.010                 | 0.006                                  | 1               | 0.011        |
| Poly-pharmacy                          | -0.188                  | 0.353         | 0.149      | -0.040  | 0.187   | 0.421                  | 0.473                                  | 0.011           | 1            |

Bivariate correlations between covariates
